# Supplementary material for: Dendritic Cells or Macrophages? The Microenvironment of Human Clear Cell Renal Cell Carcinoma Imprints a Mosaic Myeloid Subtype Associated with Patient Survival
Source: MDPI journal article supplement (doi:10.3390/cells11203289), 2022-10-19
Supplement: s1 [file s1]

**Table S10:** Upregulated ercDC\_ccRCC DEGs. Listed are genes significantly (adjusted  $p < 0.05$ ) upregulated between ercDC\_ccRCC&infMΦ\_ascOvCa and control group (431 of 788 ercDC\_ccRCC DEGs). Genes are sorted acc. to increasing adjusted p-values. Genes that also belong to ercDC\_ccRCC marker genes are in bold green. Genes related to ercDC\_ccRCC marker genes are green. Genes mentioned in main text are in grey.

| Gene symbol | Entrez ID | norm. expr.values (log2)<br>ercDC_ccRCC&infMΦ_ascOvCa | norm. expr.values (log2)<br>control group | logFC | adjusted<br>p-value |
|-------------|-----------|-------------------------------------------------------|-------------------------------------------|-------|---------------------|
| APOC1       | 341       | 11.82                                                 | 10.04                                     | 1.78  | 0.00003             |
| FOLR2       | 2350      | 8.7                                                   | 7.31                                      | 1.39  | 0.00003             |
| GAL3ST4     | 79690     | 8.01                                                  | 6.59                                      | 1.42  | 0.00006             |
| SDC3        | 9672      | 7.65                                                  | 6.42                                      | 1.23  | 0.00006             |
| ME1         | 4199      | 9.59                                                  | 8.13                                      | 1.46  | 0.00008             |
| C2          | 717       | 8.52                                                  | 7.07                                      | 1.46  | 0.00008             |
| CCL8        | 6355      | 8.53                                                  | 6.57                                      | 1.96  | 0.00012             |
| CD209       | 30835     | 8.44                                                  | 7.05                                      | 1.39  | 0.00012             |
| PLTP        | 5360      | 9.71                                                  | 7.71                                      | 2     | 0.00019             |
| SLC2A5      | 6518      | 6.85                                                  | 5.53                                      | 1.32  | 0.00019             |
| ITGA9       | 3680      | 6.19                                                  | 5.28                                      | 0.9   | 0.00019             |
| SLCO2B1     | 11309     | 9.65                                                  | 7.79                                      | 1.86  | 0.00027             |
| GPNUMB      | 10457     | 11.22                                                 | 9.09                                      | 2.13  | 0.00031             |
| ABCC5       | 10057     | 7.94                                                  | 7.1                                       | 0.84  | 0.00031             |
| AP2A2       | 161       | 8.97                                                  | 8.28                                      | 0.69  | 0.00031             |
| TNS3        | 64759     | 9.41                                                  | 8.79                                      | 0.63  | 0.00031             |
| SEPP1       | 6414      | 9.11                                                  | 6.69                                      | 2.42  | 0.00034             |
| NRP2        | 8828      | 8.12                                                  | 6.62                                      | 1.5   | 0.00034             |
| CXCL12      | 6387      | 6.52                                                  | 5.73                                      | 0.79  | 0.00034             |
| LHFPL2      | 10184     | 10.97                                                 | 9.58                                      | 1.38  | 0.00036             |
| SLC38A6     | 145389    | 10.17                                                 | 9.02                                      | 1.15  | 0.00036             |
| CMKLR1      | 1240      | 8.61                                                  | 7.16                                      | 1.46  | 0.0004              |
| OLFML2B     | 25903     | 7.65                                                  | 6.34                                      | 1.31  | 0.0004              |
| NRP1        | 8829      | 9.98                                                  | 8.25                                      | 1.73  | 0.00042             |
| SLC7A8      | 23428     | 7.9                                                   | 6.27                                      | 1.63  | 0.00042             |
| SLC38A7     | 55238     | 7.49                                                  | 6.79                                      | 0.7   | 0.00042             |
| LILRB5      | 10990     | 6.87                                                  | 5.9                                       | 0.97  | 0.00044             |
| NUPR1       | 26471     | 9.85                                                  | 8.51                                      | 1.34  | 0.00047             |
| ACP2        | 53        | 9.95                                                  | 9.05                                      | 0.91  | 0.00047             |
| EPHB2       | 2048      | 6.71                                                  | 5.8                                       | 0.91  | 0.0005              |
| WBP5        | 51186     | 8.96                                                  | 7.98                                      | 0.98  | 0.00051             |
| CTSL        | 1514      | 12.28                                                 | 10.97                                     | 1.3   | 0.00052             |
| SLC36A1     | 206358    | 8.1                                                   | 7.41                                      | 0.69  | 0.00057             |
| FABP3       | 2170      | 8.4                                                   | 6.86                                      | 1.54  | 0.00059             |
| DAB2        | 1601      | 9.9                                                   | 8.39                                      | 1.51  | 0.00059             |
| MMP14       | 4323      | 8.05                                                  | 6.92                                      | 1.14  | 0.00059             |
| KAL1        | 3730      | 8.95                                                  | 7.78                                      | 1.16  | 0.00065             |
| APOE        | 348       | 11.05                                                 | 9.23                                      | 1.82  | 0.00068             |
| ABCA1       | 19        | 9.63                                                  | 8.46                                      | 1.17  | 0.00068             |
| FRMD4A      | 55691     | 7.92                                                  | 6.81                                      | 1.11  | 0.00068             |
| TEC         | 7006      | 6.45                                                  | 5.96                                      | 0.49  | 0.00068             |
| SIGLEC1     | 6614      | 9.68                                                  | 8.23                                      | 1.45  | 0.0007              |
| CCL18       | 6362      | 11.42                                                 | 9.62                                      | 1.8   | 0.00076             |
| ADAMDEC1    | 27299     | 9.06                                                  | 7.33                                      | 1.73  | 0.00077             |
| C1QA        | 712       | 11.83                                                 | 10.41                                     | 1.42  | 0.00081             |
| DOCK4       | 9732      | 9.29                                                  | 8.04                                      | 1.25  | 0.00081             |
| CRYAB       | 1410      | 6.75                                                  | 5.68                                      | 1.08  | 0.00083             |
| NR1H3       | 10062     | 9.01                                                  | 7.95                                      | 1.06  | 0.00083             |
| RAB3IL1     | 5866      | 7.3                                                   | 6.76                                      | 0.54  | 0.00093             |

|                 |        |       |       |      |         |
|-----------------|--------|-------|-------|------|---------|
| TREM2           | 54209  | 9.99  | 8.39  | 1.6  | 0.00099 |
| PLOD2           | 5352   | 5.22  | 4.27  | 0.95 | 0.00099 |
| SLC1A3          | 6507   | 8.06  | 6.67  | 1.39 | 0.00109 |
| <b>RHOBTB3</b>  | 22836  | 7.21  | 6.07  | 1.14 | 0.00109 |
| DRAM1           | 55332  | 10.26 | 9.37  | 0.89 | 0.00109 |
| HS3ST1          | 9957   | 6.9   | 5.74  | 1.16 | 0.00109 |
| <b>MAF</b>      | 4094   | 8.17  | 6.88  | 1.28 | 0.00111 |
| <b>C1QB</b>     | 713    | 12.33 | 10.92 | 1.42 | 0.00112 |
| CD64            | 2209   | 6.96  | 5.79  | 1.18 | 0.00112 |
| <b>IL2RA</b>    | 3559   | 6.85  | 5.69  | 1.16 | 0.00112 |
| <b>ARHGAP12</b> | 94134  | 7.61  | 6.79  | 0.82 | 0.00112 |
| PSD3            | 23362  | 7.92  | 6.81  | 1.11 | 0.00115 |
| TNFRSF11A       | 8792   | 6.77  | 5.81  | 0.96 | 0.00119 |
| CTSB            | 1508   | 12.23 | 11.32 | 0.91 | 0.00119 |
| ADAP2           | 55803  | 9.85  | 9.02  | 0.83 | 0.00119 |
| CFH             | 3075   | 5.72  | 5.09  | 0.63 | 0.00127 |
| RNASE1          | 6035   | 10.53 | 8.67  | 1.86 | 0.00135 |
| ITGAV           | 3685   | 10.5  | 9.47  | 1.03 | 0.00135 |
| <b>SCAMP5</b>   | 192683 | 6.18  | 5.54  | 0.64 | 0.00149 |
| TCN2            | 6948   | 8.26  | 7.45  | 0.81 | 0.00149 |
| TDRKH           | 11022  | 6.33  | 5.65  | 0.68 | 0.00149 |
| <b>SERPING1</b> | 710    | 11.43 | 9.99  | 1.45 | 0.0015  |
| IL10            | 3586   | 6.98  | 5.89  | 1.1  | 0.00165 |
| MMP19           | 4327   | 9.5   | 8.23  | 1.27 | 0.00165 |
| <b>MS4A4A</b>   | 51338  | 10.52 | 9.3   | 1.21 | 0.00193 |
| TMEM51          | 55092  | 8.87  | 7.95  | 0.92 | 0.00193 |
| MYO7A           | 4647   | 5.97  | 5.27  | 0.71 | 0.00193 |
| ZFYVE26         | 23503  | 9.17  | 8.55  | 0.62 | 0.00193 |
| ITSN1           | 6453   | 7.87  | 6.9   | 0.97 | 0.00199 |
| SCARB2          | 950    | 9.58  | 8.67  | 0.91 | 0.00199 |
| CFB             | 629    | 8.06  | 6.82  | 1.25 | 0.00206 |
| EDNRB           | 1910   | 5.53  | 4.79  | 0.74 | 0.00207 |
| CD163           | 9332   | 8.32  | 6.79  | 1.53 | 0.00207 |
| PDCD1LG2        | 80380  | 7.64  | 6.48  | 1.16 | 0.00207 |
| STAB1           | 23166  | 8.69  | 7.56  | 1.13 | 0.00207 |
| ADAM9           | 8754   | 10.03 | 9.1   | 0.93 | 0.00207 |
| SNX24           | 28966  | 7.07  | 6.31  | 0.76 | 0.00207 |
| CD81            | 975    | 12.34 | 11.6  | 0.75 | 0.00207 |
| CD28            | 940    | 4.91  | 4.28  | 0.63 | 0.00207 |
| FLCN            | 201163 | 6.85  | 6.34  | 0.51 | 0.00207 |
| C3              | 718    | 9.97  | 8.43  | 1.54 | 0.00223 |
| MITF            | 4286   | 8.4   | 7.7   | 0.7  | 0.00228 |
| CRYBB1          | 1414   | 6.2   | 5.7   | 0.5  | 0.00228 |
| EPAS1           | 2034   | 9.11  | 7.93  | 1.18 | 0.00244 |
| GLUL            | 2752   | 10.8  | 9.74  | 1.06 | 0.00246 |
| MERTK           | 10461  | 7.93  | 6.5   | 1.43 | 0.0025  |
| ADORA3          | 140    | 7.24  | 6.02  | 1.22 | 0.0025  |
| TRPV4           | 59341  | 6.56  | 5.98  | 0.57 | 0.00257 |
| PTPRM           | 5797   | 8.37  | 7.57  | 0.79 | 0.0026  |
| BMP2K           | 55589  | 8.97  | 8.16  | 0.81 | 0.00262 |
| APPL2           | 55198  | 7.39  | 6.79  | 0.6  | 0.00263 |
| KIAA0226L       | 80183  | 8.69  | 7.6   | 1.09 | 0.00267 |
| NPC1            | 4864   | 9.11  | 8.04  | 1.07 | 0.00267 |
| LAIR1           | 3903   | 9.89  | 8.86  | 1.02 | 0.00267 |
| VAT1            | 10493  | 10.31 | 9.55  | 0.76 | 0.00267 |
| LGALS3BP        | 3959   | 10.19 | 9.19  | 1    | 0.0028  |

|             |        |       |       |      |         |
|-------------|--------|-------|-------|------|---------|
| GNPDA1      | 10007  | 9.75  | 9.19  | 0.56 | 0.00285 |
| IDH1        | 3417   | 10.69 | 9.84  | 0.85 | 0.00288 |
| HNMT        | 3176   | 9.35  | 8.36  | 1    | 0.00288 |
| <b>LGMN</b> | 5641   | 11.67 | 10.11 | 1.56 | 0.00288 |
| CD84        | 8832   | 9.11  | 7.84  | 1.27 | 0.0029  |
| SGMS1       | 259230 | 8.66  | 7.91  | 0.75 | 0.0033  |
| CTSD        | 1509   | 11.32 | 10.42 | 0.9  | 0.00346 |
| BCL2L1      | 598    | 7.62  | 6.72  | 0.9  | 0.00348 |
| STX4        | 6810   | 9.78  | 9.24  | 0.53 | 0.00355 |
| SDS         | 10993  | 7.87  | 6.8   | 1.07 | 0.00369 |
| BNIP3       | 664    | 8.06  | 7.01  | 1.05 | 0.00369 |
| SPP1        | 6696   | 11.15 | 8.64  | 2.51 | 0.00375 |
| MPP1        | 4354   | 10.58 | 9.99  | 0.59 | 0.00385 |
|             | 3569   | 7.68  | 6.29  | 1.39 | 0.00389 |
| NPL         | 80896  | 9     | 7.94  | 1.06 | 0.00389 |
| STARD13     | 90627  | 6.22  | 5.7   | 0.52 | 0.00395 |
| FCGR1B      | 2210   | 11.09 | 9.8   | 1.29 | 0.004   |
| MARCKS      | 4082   | 10.25 | 8.94  | 1.31 | 0.00412 |
| TCF12       | 6938   | 9.19  | 8.63  | 0.56 | 0.00412 |
| PLA2G15     | 23659  | 8.76  | 8.07  | 0.68 | 0.00421 |
| CCL4        | 6351   | 11.32 | 9.56  | 1.76 | 0.00432 |
| VSIG4       | 11326  | 11.86 | 10.59 | 1.27 | 0.00433 |
| CCL2        | 6347   | 10.46 | 8.71  | 1.76 | 0.00459 |
| MGAT4A      | 11320  | 9.3   | 8.1   | 1.2  | 0.00459 |
| RND3        | 390    | 8.82  | 7.69  | 1.13 | 0.00459 |
| RGL1        | 23179  | 9.28  | 8.17  | 1.11 | 0.00459 |
| LIPA        | 3988   | 12.69 | 12    | 0.69 | 0.00459 |
| COLGALT1    | 79709  | 8.91  | 8.32  | 0.59 | 0.00459 |
| CREG1       | 8804   | 12.04 | 11.5  | 0.53 | 0.00459 |
| LRP1        | 4035   | 8.64  | 7.99  | 0.65 | 0.00463 |
| CYFIP1      | 23191  | 11.25 | 10.73 | 0.52 | 0.00463 |
| CPM         | 1368   | 9.7   | 8.68  | 1.02 | 0.00465 |
| CALU        | 813    | 8.49  | 7.88  | 0.61 | 0.00475 |
| MYO5A       | 4644   | 8.96  | 8.43  | 0.53 | 0.0049  |
| <b>IGF1</b> | 3479   | 7.08  | 5.85  | 1.23 | 0.00491 |
| MAPK13      | 5603   | 8.2   | 7.49  | 0.72 | 0.00491 |
| GALC        | 2581   | 9.19  | 8.47  | 0.72 | 0.00491 |
| FZD5        | 7855   | 7.25  | 6.59  | 0.67 | 0.00504 |
| SLC6A8      | 6535   | 6.72  | 6.19  | 0.53 | 0.00504 |
| DYNLT3      | 6990   | 10.21 | 9.72  | 0.49 | 0.0054  |
| PLIN2       | 123    | 10.84 | 9.93  | 0.92 | 0.00547 |
| METTL1      | 4234   | 7.44  | 6.86  | 0.58 | 0.00561 |
| EYA2        | 2139   | 5.29  | 4.87  | 0.42 | 0.00574 |
| CXCL10      | 3627   | 10.24 | 8.15  | 2.08 | 0.00575 |
| CXCL2       | 2920   | 10.79 | 9.38  | 1.41 | 0.00582 |
| TFRC        | 7037   | 10.35 | 9.33  | 1.03 | 0.00582 |
| PLXNA3      | 55558  | 6.46  | 5.86  | 0.6  | 0.00582 |
| ATP13A2     | 23400  | 7.37  | 6.72  | 0.65 | 0.00605 |
| LYVE1       | 10894  | 6.39  | 5.4   | 1    | 0.0066  |
| OLR1        | 4973   | 11    | 9.4   | 1.6  | 0.00663 |
| RBM47       | 54502  | 9.35  | 8.69  | 0.65 | 0.00668 |
| FN1         | 2335   | 10.06 | 8.12  | 1.93 | 0.00675 |
| MARCO       | 8685   | 10.44 | 9.42  | 1.03 | 0.00683 |
| FAM13A      | 10144  | 8.11  | 7.33  | 0.78 | 0.00683 |
| APIB1       | 162    | 8.95  | 8.46  | 0.49 | 0.00683 |
| CAMSAP2     | 23271  | 7.83  | 7.03  | 0.8  | 0.00687 |

|           |        |       |       |      |         |
|-----------|--------|-------|-------|------|---------|
| IGFBP4    | 3487   | 7.04  | 6.45  | 0.59 | 0.00698 |
| P4HA2     | 8974   | 7.5   | 6.97  | 0.53 | 0.00711 |
| ATP6V1C1  | 528    | 8.56  | 7.86  | 0.7  | 0.00723 |
| ENOSF1    | 55556  | 8.16  | 7.49  | 0.67 | 0.00754 |
| GPR65     | 8477   | 10.49 | 9.78  | 0.71 | 0.0076  |
| OLFML3    | 56944  | 6.1   | 5.5   | 0.6  | 0.0076  |
| SLC11A2   | 4891   | 8.37  | 7.79  | 0.57 | 0.0076  |
| PLAT      | 5327   | 5.3   | 4.77  | 0.52 | 0.0076  |
| PLXND1    | 23129  | 9.37  | 8.85  | 0.52 | 0.0076  |
| CTSZ      | 1522   | 11.03 | 10.49 | 0.54 | 0.00797 |
| CXCL1     | 2919   | 8.55  | 7.33  | 1.22 | 0.00807 |
| ETV5      | 2119   | 7.67  | 6.56  | 1.11 | 0.00812 |
| DNASE2    | 1777   | 8.54  | 7.76  | 0.79 | 0.00812 |
| CD204     | 4481   | 9.74  | 8.14  | 1.6  | 0.00817 |
| IFI27     | 3429   | 9.65  | 8.19  | 1.47 | 0.00818 |
| ASPH      | 444    | 8.16  | 7.41  | 0.75 | 0.00818 |
| PLAU      | 5328   | 8.77  | 7.62  | 1.15 | 0.00827 |
| HOMER3    | 9454   | 7.32  | 6.71  | 0.61 | 0.00856 |
| ITPR2     | 3709   | 9.18  | 8.33  | 0.85 | 0.00876 |
| FABP5     | 2171   | 11.79 | 10.75 | 1.03 | 0.00877 |
| FNDC3B    | 64778  | 8.84  | 8.13  | 0.71 | 0.00969 |
| GPR137B   | 7107   | 10.84 | 10.08 | 0.76 | 0.00992 |
| ANGPTL4   | 51129  | 6.29  | 5.73  | 0.56 | 0.00992 |
| TIMP2     | 7077   | 10.99 | 10.48 | 0.51 | 0.00992 |
| GLA       | 2717   | 10.87 | 10.29 | 0.58 | 0.0101  |
| PI4K2A    | 55361  | 8.75  | 8.17  | 0.58 | 0.01016 |
| KCNMA1    | 3778   | 8.67  | 7.51  | 1.15 | 0.01024 |
| ELL2      | 22936  | 8.79  | 7.84  | 0.96 | 0.01035 |
| MMP2      | 4313   | 7.67  | 6.67  | 0.99 | 0.01036 |
| DYRK4     | 8798   | 7.75  | 7.32  | 0.43 | 0.01036 |
| CP        | 1356   | 5.03  | 4.2   | 0.83 | 0.01039 |
| A2M       | 2      | 11.18 | 9.48  | 1.7  | 0.0104  |
| FRMD4B    | 23150  | 8.6   | 7.67  | 0.93 | 0.0104  |
| PLEKHO2   | 80301  | 9.95  | 9.46  | 0.49 | 0.01079 |
| HAMP      | 57817  | 8.1   | 6.82  | 1.29 | 0.01099 |
| ADAMTS2   | 9509   | 5.74  | 5.3   | 0.44 | 0.01115 |
| SCIN      | 85477  | 5.25  | 4.52  | 0.73 | 0.01139 |
| IQCG      | 84223  | 7.12  | 6.69  | 0.43 | 0.01139 |
| LINC00597 | 81698  | 5.16  | 4.73  | 0.43 | 0.01139 |
| LILRB4    | 11006  | 9.02  | 8.24  | 0.77 | 0.01143 |
| PEAK1     | 79834  | 8.04  | 7.55  | 0.49 | 0.0118  |
| SLC16A10  | 117247 | 7.59  | 6.48  | 1.11 | 0.01183 |
| CTSA      | 5476   | 11.29 | 10.74 | 0.55 | 0.01183 |
| ACE       | 1636   | 6.14  | 5.66  | 0.48 | 0.01183 |
| ATG7      | 10533  | 7.31  | 6.79  | 0.52 | 0.01194 |
| MKNK1     | 8569   | 9.51  | 8.86  | 0.65 | 0.012   |
| PLD3      | 23646  | 10.31 | 9.49  | 0.82 | 0.01204 |
| CXCL11    | 6373   | 7.07  | 5.48  | 1.59 | 0.01226 |
| SGPL1     | 8879   | 8.52  | 7.98  | 0.54 | 0.0123  |
| FPR3      | 2359   | 10.57 | 9.15  | 1.42 | 0.01241 |
| RCN3      | 57333  | 6.72  | 6.32  | 0.41 | 0.01252 |
| PMP22     | 5376   | 10.3  | 9.2   | 1.1  | 0.0127  |
| PROS1     | 5627   | 8.22  | 7.57  | 0.65 | 0.01279 |
| RAB13     | 5872   | 10.31 | 9.57  | 0.74 | 0.01288 |
| CDR1      | 1038   | 4.36  | 3.84  | 0.51 | 0.01288 |
| ECM1      | 1893   | 7.47  | 6.77  | 0.71 | 0.01295 |

|              |        |       |       |      |         |
|--------------|--------|-------|-------|------|---------|
| WASF1        | 8936   | 4.81  | 4.31  | 0.5  | 0.01313 |
| ATP2A2       | 488    | 8.51  | 8.07  | 0.44 | 0.01316 |
| CADM1        | 23705  | 7.64  | 6.36  | 1.28 | 0.0132  |
| FARP1        | 10160  | 7.68  | 7.15  | 0.53 | 0.0132  |
| WDFY3        | 23001  | 7.36  | 6.77  | 0.59 | 0.01333 |
| SLC37A4      | 2542   | 7.25  | 6.86  | 0.38 | 0.01348 |
| RNASE2       | 6036   | 7.92  | 6.95  | 0.97 | 0.01351 |
| ALG9         | 79796  | 7.64  | 7.2   | 0.44 | 0.01352 |
| HSPB1        | 3315   | 10.96 | 10.13 | 0.83 | 0.01353 |
| HSP90B1      | 7184   | 9.34  | 8.67  | 0.67 | 0.01356 |
| ABCG1        | 9619   | 8.03  | 7.24  | 0.79 | 0.01363 |
| DENND2D      | 79961  | 9     | 8.54  | 0.46 | 0.01373 |
| PDIA5        | 10954  | 7.16  | 6.67  | 0.49 | 0.01383 |
| MMP9         | 4318   | 9.81  | 8.47  | 1.34 | 0.01402 |
| SAMD4A       | 23034  | 7.76  | 7.11  | 0.65 | 0.01404 |
| PPARG        | 5468   | 9.26  | 8.4   | 0.86 | 0.01425 |
| TNS1         | 7145   | 8.89  | 7.65  | 1.23 | 0.01452 |
| SCCPDH       | 51097  | 8.5   | 7.94  | 0.56 | 0.01541 |
| CH25H        | 9023   | 7.89  | 6.63  | 1.26 | 0.01549 |
| ADM          | 133    | 9.08  | 8.12  | 0.96 | 0.01552 |
| ST8SIA4      | 7903   | 7.17  | 6.48  | 0.69 | 0.01595 |
| SCD          | 6319   | 9.38  | 8.19  | 1.19 | 0.01618 |
| ACP5         | 54     | 11.01 | 10.19 | 0.82 | 0.01647 |
| PCOLCE2      | 26577  | 8.39  | 7.58  | 0.81 | 0.01656 |
| 9月-08        | 23176  | 6.95  | 6.52  | 0.43 | 0.01656 |
| PLEKHM2      | 23207  | 8.46  | 8.04  | 0.42 | 0.01656 |
| <b>CXCL9</b> | 4283   | 9.73  | 7.88  | 1.85 | 0.01704 |
| IL15RA       | 3601   | 8.23  | 7.64  | 0.6  | 0.01704 |
| APBB3        | 10307  | 7.35  | 6.91  | 0.45 | 0.01737 |
| ZFP36L1      | 677    | 9.84  | 9.12  | 0.72 | 0.01763 |
| AMPD3        | 272    | 8.78  | 8.03  | 0.74 | 0.01765 |
| SLC4A7       | 9497   | 7.41  | 6.78  | 0.63 | 0.01765 |
| TBC1D2       | 55357  | 8.5   | 7.89  | 0.6  | 0.01765 |
| SLC2A8       | 29988  | 6.73  | 6.27  | 0.46 | 0.01765 |
| EOGT         | 285203 | 7.95  | 7.36  | 0.59 | 0.01779 |
| NFE2L1       | 4779   | 9.28  | 8.84  | 0.44 | 0.01779 |
| LPAR6        | 10161  | 10.06 | 9.23  | 0.83 | 0.0179  |
| RENBP        | 5973   | 7.58  | 7.07  | 0.51 | 0.0179  |
| FUCA1        | 2517   | 11.39 | 10.57 | 0.82 | 0.01799 |
| MAFB         | 9935   | 11.67 | 10.74 | 0.93 | 0.01852 |
| ZDHC14       | 79683  | 7.2   | 6.72  | 0.48 | 0.01852 |
| BAMBI        | 25805  | 6     | 5.5   | 0.5  | 0.01859 |
| ABCC3        | 8714   | 8.43  | 7.69  | 0.73 | 0.01883 |
| TPX2         | 22974  | 6.15  | 5.56  | 0.59 | 0.01883 |
| GBAP1        | 2630   | 8.1   | 7.74  | 0.37 | 0.01883 |
| GNPTAB       | 79158  | 8.78  | 8.29  | 0.49 | 0.01894 |
| CXCL3        | 2921   | 9.27  | 8.22  | 1.05 | 0.01896 |
| CTSC         | 1075   | 10.9  | 10.12 | 0.78 | 0.0196  |
| CD82         | 3732   | 8.49  | 7.84  | 0.65 | 0.0198  |
| RACGAP1      | 29127  | 7.72  | 7.16  | 0.55 | 0.01998 |
| P2RX4        | 5025   | 9.7   | 9.03  | 0.67 | 0.02036 |
| TGFBI        | 7045   | 12.22 | 11.66 | 0.56 | 0.02045 |
| LXN          | 56925  | 7.38  | 6.86  | 0.52 | 0.02045 |
| PPAP2B       | 8613   | 9     | 8     | 1    | 0.02048 |
| SPHK1        | 8877   | 7.41  | 6.77  | 0.65 | 0.02048 |
| P4HB         | 5034   | 9.86  | 9.14  | 0.72 | 0.02081 |

|          |        |       |       |      |         |
|----------|--------|-------|-------|------|---------|
| IER3     | 8870   | 11.54 | 10.32 | 1.21 | 0.02128 |
| PLOD1    | 5351   | 8.6   | 8.22  | 0.38 | 0.02128 |
| ITGB5    | 3693   | 6.83  | 6.05  | 0.77 | 0.02155 |
| TMEM140  | 55281  | 8.75  | 8.22  | 0.53 | 0.02162 |
| ATP6V0A1 | 535    | 8.86  | 8.32  | 0.54 | 0.02167 |
| BNC2     | 54796  | 5.75  | 5.25  | 0.49 | 0.02167 |
| NENF     | 29937  | 8.57  | 8.18  | 0.39 | 0.02167 |
| RRAGD    | 58528  | 9.86  | 9.27  | 0.6  | 0.0217  |
| CD59     | 966    | 8.6   | 7.77  | 0.83 | 0.02187 |
| ACVRL1   | 94     | 7.62  | 7.1   | 0.52 | 0.02206 |
| GAA      | 2548   | 9.63  | 9.14  | 0.48 | 0.02257 |
| CD80     | 941    | 8.19  | 7.1   | 1.09 | 0.02272 |
| CTNS     | 1497   | 8.43  | 7.83  | 0.6  | 0.02272 |
| SLC31A1  | 1317   | 9.1   | 8.56  | 0.54 | 0.02272 |
| NABP1    | 64859  | 9.35  | 8.72  | 0.63 | 0.02296 |
| PDIA4    | 9601   | 9.21  | 8.68  | 0.54 | 0.02296 |
| HSPA5    | 3309   | 10.33 | 9.79  | 0.54 | 0.02311 |
| COLEC12  | 81035  | 8.99  | 8.14  | 0.85 | 0.02311 |
| MDFIC    | 29969  | 8.23  | 7.58  | 0.65 | 0.02311 |
| BLNK     | 29760  | 9.14  | 8.1   | 1.04 | 0.02312 |
| MMP7     | 4316   | 6.57  | 5.61  | 0.96 | 0.02329 |
| AAK1     | 22848  | 8.95  | 8.53  | 0.42 | 0.0235  |
| CCL7     | 6354   | 6.43  | 5.57  | 0.86 | 0.02353 |
| ARHGAP6  | 395    | 7.24  | 6.78  | 0.46 | 0.02353 |
| FCGRT    | 2217   | 10.71 | 10.24 | 0.48 | 0.02378 |
| EPHX1    | 2052   | 8.02  | 7.43  | 0.58 | 0.02387 |
| B2M      | 567    | 9.52  | 9.13  | 0.39 | 0.02387 |
| TRIP6    | 7205   | 8.46  | 8.06  | 0.4  | 0.02393 |
| CD14     | 929    | 11.49 | 10.52 | 0.97 | 0.02409 |
| ATXN1    | 6310   | 8.59  | 7.92  | 0.67 | 0.02411 |
| HTRA1    | 5654   | 7.6   | 6.95  | 0.65 | 0.02411 |
| LAMP1    | 3916   | 9.72  | 8.81  | 0.91 | 0.02412 |
| GGCX     | 2677   | 7.5   | 7.12  | 0.37 | 0.02418 |
| GATM     | 2628   | 8.5   | 7.42  | 1.08 | 0.02487 |
| PXDC1    | 221749 | 7.73  | 7.07  | 0.66 | 0.0252  |
| SERPINE1 | 5054   | 7.06  | 6.24  | 0.83 | 0.02551 |
| IKBKE    | 9641   | 7.31  | 6.93  | 0.38 | 0.02551 |
| DGKH     | 160851 | 5.47  | 5.1   | 0.37 | 0.02551 |
| PAX8     | 7849   | 6.53  | 5.95  | 0.58 | 0.02585 |
| PRUNE2   | 158471 | 6.94  | 5.97  | 0.96 | 0.02606 |
| ENG      | 2022   | 9.2   | 8.5   | 0.7  | 0.02606 |
| CIR      | 715    | 6.65  | 6.08  | 0.57 | 0.02606 |
| CD2AP    | 23607  | 7.79  | 7.24  | 0.56 | 0.02606 |
| TUBG1    | 7283   | 8.36  | 7.89  | 0.48 | 0.02606 |
| KIAA1279 | 26128  | 7.78  | 7.38  | 0.4  | 0.02606 |
| ERI2     | 112479 | 7.34  | 6.93  | 0.42 | 0.02618 |
| AHI1     | 54806  | 7.36  | 6.7   | 0.65 | 0.02626 |
| MSRB2    | 22921  | 8.5   | 8.06  | 0.44 | 0.0265  |
| DHRS3    | 9249   | 9.01  | 8.16  | 0.85 | 0.02654 |
| SERPINH1 | 871    | 7.86  | 7.23  | 0.63 | 0.02736 |
| MR1      | 3140   | 7.46  | 6.96  | 0.5  | 0.02736 |
| ME2      | 4200   | 9.09  | 8.6   | 0.5  | 0.02736 |
| DSC2     | 1824   | 8.48  | 7.6   | 0.88 | 0.02772 |
| LAMP2    | 3920   | 9.89  | 9.34  | 0.55 | 0.02806 |
| MORF4L2  | 9643   | 6.95  | 6.43  | 0.52 | 0.02842 |
| CA12     | 771    | 6.19  | 5.47  | 0.72 | 0.02854 |

|          |           |       |       |      |         |
|----------|-----------|-------|-------|------|---------|
| HSD17B14 | 51171     | 7.13  | 6.61  | 0.51 | 0.02854 |
| QKI      | 9444      | 8.66  | 8.14  | 0.52 | 0.02854 |
| RARRES1  | 5918      | 7.02  | 6.12  | 0.9  | 0.02866 |
| CALR     | 811       | 10.03 | 9.35  | 0.69 | 0.02887 |
| LUM      | 4060      | 4.74  | 4.2   | 0.54 | 0.02912 |
| C10orf10 | 11067     | 5.87  | 5.43  | 0.45 | 0.02912 |
| KIAA1199 | 57214     | 5.46  | 5.08  | 0.37 | 0.02912 |
| COL1A1   | 1277      | 7.07  | 6.52  | 0.55 | 0.02928 |
| PVRL2    | 5819      | 7.52  | 6.88  | 0.64 | 0.02929 |
| SMURF2   | 64750     | 7.89  | 7.28  | 0.61 | 0.02943 |
| CCL13    | 6357      | 7.34  | 6.43  | 0.91 | 0.02989 |
| NTAN1    | 123803    | 9.16  | 8.68  | 0.49 | 0.02989 |
| TFEC     | 22797     | 9.53  | 8.68  | 0.85 | 0.03004 |
| GCNT1    | 2650      | 7.69  | 7.15  | 0.54 | 0.03059 |
| PLD1     | 5337      | 6.63  | 5.95  | 0.67 | 0.03059 |
| CD9      | 928       | 9.62  | 8.55  | 1.07 | 0.03123 |
| EPB41L2  | 2037      | 9.04  | 8.38  | 0.66 | 0.03123 |
| EIF4A3   | 9775      | 10.54 | 10.09 | 0.44 | 0.03123 |
| CCRL2    | 9034      | 8.92  | 8.17  | 0.75 | 0.03178 |
| ARHGAP10 | 79658     | 7.96  | 7.5   | 0.46 | 0.03203 |
| PDGFRL   | 5157      | 4.99  | 4.59  | 0.4  | 0.033   |
| EPB41L3  | 23136     | 10.43 | 9.8   | 0.64 | 0.03305 |
| CD24     | 100133941 | 6.34  | 5.38  | 0.96 | 0.0332  |
| FAM168A  | 23201     | 7.61  | 7.21  | 0.4  | 0.03354 |
| KLF6     | 1316      | 9.57  | 8.89  | 0.67 | 0.03429 |
| DSE      | 29940     | 11.12 | 10.48 | 0.65 | 0.03434 |
| MELK     | 9833      | 6.65  | 6.07  | 0.58 | 0.03434 |
| CD68     | 968       | 10.56 | 10.16 | 0.4  | 0.03436 |
| MDC1     | 9656      | 7.22  | 6.82  | 0.4  | 0.03443 |
| CLN6     | 54982     | 7.98  | 7.48  | 0.5  | 0.03482 |
| COL3A1   | 1281      | 5.74  | 5.32  | 0.42 | 0.03482 |
| IBSP     | 3381      | 5.37  | 4.95  | 0.41 | 0.03482 |
| RYR1     | 6261      | 7.13  | 6.53  | 0.6  | 0.03497 |
| TRPM2    | 7226      | 6.98  | 6.55  | 0.43 | 0.03592 |
| ASIP     | 434       | 5.23  | 4.84  | 0.39 | 0.03598 |
| PDIA3    | 2923      | 10.24 | 9.89  | 0.35 | 0.03652 |
| BHLHE41  | 79365     | 8.47  | 7.43  | 1.03 | 0.03661 |
| CEP55    | 55165     | 6.05  | 5.34  | 0.72 | 0.03673 |
| HIVEP3   | 59269     | 7.13  | 6.5   | 0.62 | 0.03716 |
| PRDX4    | 10549     | 9.73  | 9.32  | 0.4  | 0.03728 |
| STAT1    | 6772      | 10.14 | 9.5   | 0.64 | 0.03733 |
| APOL1    | 8542      | 7.99  | 7.39  | 0.6  | 0.03738 |
| ARHGEF11 | 9826      | 7.45  | 6.96  | 0.49 | 0.03756 |
| TGM2     | 7052      | 9.77  | 8.9   | 0.87 | 0.03801 |
| MT1E     | 4493      | 9.64  | 8.97  | 0.67 | 0.03801 |
| ARMCX1   | 51309     | 8.18  | 7.69  | 0.49 | 0.03801 |
| LAMC1    | 3915      | 6.79  | 6.16  | 0.63 | 0.03811 |
| CYB5A    | 1528      | 9.61  | 9.19  | 0.42 | 0.03819 |
| MGAT5    | 4249      | 9.45  | 9.06  | 0.39 | 0.03838 |
| CDCP1    | 64866     | 8.31  | 7.59  | 0.72 | 0.03845 |
| DENND4C  | 55667     | 9.34  | 8.86  | 0.48 | 0.03845 |
| TSPAN4   | 7106      | 8.42  | 7.8   | 0.62 | 0.0385  |
| TLR7     | 51284     | 9.49  | 8.38  | 1.11 | 0.03866 |
| MGLL     | 11343     | 9.67  | 9.1   | 0.57 | 0.03893 |
| GNG12    | 55970     | 6.91  | 6.35  | 0.56 | 0.03893 |
| RPS27L   | 51065     | 8.05  | 7.53  | 0.52 | 0.03905 |

|          |        |       |       |      |         |
|----------|--------|-------|-------|------|---------|
| RASGRP3  | 25780  | 7.95  | 7.05  | 0.9  | 0.03919 |
| TNFAIP3  | 7128   | 10.77 | 9.97  | 0.8  | 0.03919 |
| RBP4     | 5950   | 7.85  | 7.27  | 0.58 | 0.03919 |
| COL1A2   | 1278   | 6.13  | 5.7   | 0.43 | 0.03919 |
| SASH1    | 23328  | 9.01  | 8.35  | 0.66 | 0.03928 |
| THBS3    | 7059   | 6.09  | 5.78  | 0.31 | 0.03936 |
| PLOD3    | 8985   | 9.36  | 9.03  | 0.33 | 0.03973 |
| SGK1     | 6446   | 12.04 | 11.46 | 0.58 | 0.04045 |
| SLC39A8  | 64116  | 8.06  | 7.01  | 1.05 | 0.04047 |
| HMOX1    | 3162   | 11.21 | 10.54 | 0.68 | 0.04047 |
| LIMK2    | 3985   | 7.4   | 6.87  | 0.53 | 0.04047 |
| LY96     | 23643  | 10.77 | 10.36 | 0.4  | 0.04047 |
| KIFC3    | 3801   | 6.08  | 5.71  | 0.36 | 0.04115 |
| CD151    | 977    | 8.58  | 8.06  | 0.52 | 0.04142 |
| RRBP1    | 6238   | 7.88  | 7.48  | 0.41 | 0.04143 |
| MILR1    | 284021 | 8.3   | 7.76  | 0.54 | 0.04155 |
| FER      | 2241   | 6.19  | 5.8   | 0.39 | 0.04155 |
| C3AR1    | 719    | 11.49 | 10.56 | 0.93 | 0.04161 |
| B3GALNT1 | 8706   | 6.44  | 5.77  | 0.67 | 0.04202 |
| LAP3     | 51056  | 11.47 | 11.01 | 0.46 | 0.04242 |
| SPATA7   | 55812  | 6.01  | 5.62  | 0.39 | 0.04244 |
| FAM114A1 | 92689  | 6.73  | 6.28  | 0.46 | 0.0434  |
| ATRN     | 8455   | 7.54  | 7.18  | 0.36 | 0.0437  |
| CCL20    | 6364   | 9.16  | 7.78  | 1.38 | 0.04372 |
| MT2A     | 4502   | 12.07 | 11.5  | 0.58 | 0.04399 |
| MUC1     | 4582   | 6.51  | 6.1   | 0.41 | 0.04402 |
| GIMAP6   | 474344 | 8.04  | 7.24  | 0.8  | 0.04425 |
| CCND1    | 595    | 6.73  | 6.03  | 0.7  | 0.04425 |
| UAP1L1   | 91373  | 6.93  | 6.55  | 0.38 | 0.04426 |
| GADD45B  | 4616   | 9.53  | 8.87  | 0.66 | 0.04447 |
| CBR1     | 873    | 8.19  | 7.83  | 0.36 | 0.04447 |
| NUCB1    | 4924   | 8.87  | 8.33  | 0.55 | 0.04452 |
| MT1G     | 4495   | 10.37 | 9.63  | 0.75 | 0.04487 |
| NLK      | 51701  | 7.5   | 7.11  | 0.39 | 0.04579 |
| IGFBP3   | 3486   | 6.52  | 5.93  | 0.59 | 0.04714 |
| GADD45G  | 10912  | 6.77  | 6.27  | 0.5  | 0.04714 |
| VCAM1    | 7412   | 6.21  | 5.5   | 0.71 | 0.04716 |
| PRDM1    | 639    | 8.73  | 7.91  | 0.83 | 0.04729 |
| KCNJ5    | 3762   | 6.19  | 5.77  | 0.42 | 0.04753 |
| ABL2     | 27     | 7.44  | 6.84  | 0.61 | 0.04865 |
| STEAP3   | 55240  | 7.25  | 6.77  | 0.48 | 0.04884 |
| CDH6     | 1004   | 5.62  | 5.24  | 0.38 | 0.04884 |
| SREBF1   | 6720   | 7.44  | 7.11  | 0.33 | 0.04892 |
| APOL2    | 23780  | 7.4   | 7.04  | 0.36 | 0.04933 |
| FGFR1    | 2260   | 6.54  | 6.12  | 0.43 | 0.04939 |
| TMEM180  | 79847  | 7.48  | 7.12  | 0.35 | 0.0495  |
