# Supplementary material for: Dendritic Cells or Macrophages? The Microenvironment of Human Clear Cell Renal Cell Carcinoma Imprints a Mosaic Myeloid Subtype Associated with Patient Survival
Source: MDPI journal article supplement (doi:10.3390/cells11203289), 2022-10-19
Supplement: s1 [file s1]

**Table S11:** Downregulated ercDC\_ccRCC DEGs. Listed are genes significantly (adjusted p<0.05) downregulated between ercDC\_ccRCC&infMΦ\_ascOvCa and control group (357 of 788 ercDC\_ccRCC DEGs). Genes are sorted acc. to increasing adjusted p-values. Genes that belong to ercDC\_ccRCC marker genes are in bold green. Genes related to ercDC\_ccRCC marker genes are in green. Genes mentioned in main text are in grey

| Gene symbol   | Entrez ID | norm. expr. values (log)<br>ercDC_RCC&infMΦ_ascOvCa | norm. expr.values (log)<br>control group | logFC | adjusted<br>p-value |
|---------------|-----------|-----------------------------------------------------|------------------------------------------|-------|---------------------|
| <b>FAM65B</b> | 9750      | 5.16                                                | 6.4                                      | -1.23 | 0.00034             |
| RPS9          | 6203      | 11.06                                               | 11.73                                    | -0.67 | 0.0004              |
| SLC25A6       | 293       | 10.86                                               | 11.57                                    | -0.71 | 0.00043             |
| <b>FGR</b>    | 2268      | 9.39                                                | 10.53                                    | -1.13 | 0.00059             |
| NUP210        | 23225     | 6.66                                                | 7.48                                     | -0.81 | 0.00068             |
| RHOF          | 54509     | 5.82                                                | 6.94                                     | -1.12 | 0.00068             |
| PBX2          | 5089      | 7.06                                                | 7.64                                     | -0.58 | 0.0007              |
| CCND3         | 896       | 8.81                                                | 9.53                                     | -0.71 | 0.0007              |
| <b>CFP</b>    | 5199      | 6.44                                                | 7.77                                     | -1.34 | 0.00081             |
| ICAM3         | 3385      | 6.56                                                | 7.76                                     | -1.2  | 0.00093             |
| EIF4EBP2      | 1979      | 7.83                                                | 8.42                                     | -0.59 | 0.00104             |
| <b>FYN</b>    | 2534      | 6.14                                                | 7.22                                     | -1.07 | 0.00109             |
| CD244         | 51744     | 5.14                                                | 6.09                                     | -0.95 | 0.00112             |
| RAB11FIP4     | 84440     | 5.73                                                | 6.37                                     | -0.65 | 0.00119             |
| SMAD3         | 4088      | 5.91                                                | 6.56                                     | -0.65 | 0.00119             |
| <b>CYTIP</b>  | 9595      | 9.11                                                | 9.94                                     | -0.83 | 0.00126             |
| EIF3E         | 3646      | 8.19                                                | 8.71                                     | -0.51 | 0.00149             |
| RPL15         | 6138      | 8.28                                                | 8.79                                     | -0.5  | 0.00166             |
| LIMD2         | 80774     | 5.99                                                | 6.5                                      | -0.51 | 0.00166             |
| ZBTB18        | 10472     | 6.57                                                | 7.21                                     | -0.65 | 0.0017              |
| <b>EMR3</b>   | 84658     | 5.51                                                | 6.98                                     | -1.47 | 0.0017              |
| CSNK1G2       | 1455      | 7.07                                                | 7.59                                     | -0.52 | 0.00183             |
| GSTP1         | 2950      | 9.74                                                | 10.3                                     | -0.56 | 0.00196             |
| BCL11A        | 53335     | 5.33                                                | 6.54                                     | -1.21 | 0.00197             |
| FCHO1         | 23149     | 6.1                                                 | 6.62                                     | -0.52 | 0.00199             |
| ATP8A1        | 10396     | 5.96                                                | 6.76                                     | -0.8  | 0.00199             |
| RPL31         | 6160      | 8                                                   | 8.68                                     | -0.68 | 0.00207             |
| UPK3A         | 7380      | 5.03                                                | 5.59                                     | -0.56 | 0.00223             |
| ITGA4         | 3676      | 5.84                                                | 6.78                                     | -0.94 | 0.00223             |
| GLTSCR2       | 29997     | 8.11                                                | 8.66                                     | -0.55 | 0.00224             |
| LSP1          | 4046      | 7.96                                                | 8.87                                     | -0.91 | 0.00228             |
| SEZ6L         | 23544     | 4.82                                                | 5.4                                      | -0.58 | 0.0025              |
| TSPAN32       | 10077     | 5.87                                                | 6.66                                     | -0.78 | 0.00254             |
| EIF3G         | 8666      | 9.65                                                | 10.18                                    | -0.53 | 0.00267             |
| KIAA0922      | 23240     | 7.48                                                | 8.29                                     | -0.81 | 0.00288             |
| JAK1          | 3716      | 8.75                                                | 9.34                                     | -0.59 | 0.00289             |
| <b>NEDD9</b>  | 4739      | 6.77                                                | 7.65                                     | -0.88 | 0.00298             |
| ACAA1         | 30        | 8.38                                                | 8.86                                     | -0.48 | 0.00316             |
| P2RY10        | 27334     | 4.45                                                | 5.22                                     | -0.77 | 0.00319             |
| SIGIRR        | 59307     | 6.23                                                | 6.73                                     | -0.51 | 0.00327             |
| <b>TES</b>    | 26136     | 8                                                   | 8.75                                     | -0.75 | 0.0033              |
| RPS23         | 6228      | 7.21                                                | 7.77                                     | -0.56 | 0.00366             |
| RPS16         | 6217      | 9.18                                                | 9.64                                     | -0.46 | 0.00375             |
| MED28         | 80306     | 7.76                                                | 8.26                                     | -0.49 | 0.00375             |
| <b>CD48</b>   | 962       | 8.97                                                | 9.82                                     | -0.85 | 0.00375             |
| RAC2          | 5880      | 8.37                                                | 9.26                                     | -0.88 | 0.00375             |

|                |        |       |       |       |         |
|----------------|--------|-------|-------|-------|---------|
| CD101          | 9398   | 6.47  | 7.63  | -1.16 | 0.00375 |
| SF3A1          | 10291  | 8.16  | 8.68  | -0.53 | 0.00392 |
| USP3           | 9960   | 9.49  | 10.02 | -0.53 | 0.00421 |
| SPN            | 6693   | 6.63  | 7.43  | -0.81 | 0.00424 |
| S1PR4          | 8698   | 6.86  | 7.41  | -0.55 | 0.00434 |
| LYST           | 1130   | 7.27  | 8.34  | -1.07 | 0.00459 |
| RAB11FIP1      | 80223  | 7.96  | 8.58  | -0.62 | 0.00463 |
| CNN2           | 1265   | 8.35  | 8.93  | -0.58 | 0.0047  |
| POLR1D         | 51082  | 9.04  | 9.51  | -0.47 | 0.00475 |
| C15orf39       | 56905  | 6.58  | 7.21  | -0.63 | 0.00475 |
| TRAF3IP3       | 80342  | 5.66  | 6.48  | -0.83 | 0.00504 |
| MST4           | 51765  | 6.54  | 7.31  | -0.77 | 0.00545 |
| RNF41          | 10193  | 6.25  | 6.73  | -0.48 | 0.00547 |
| FCER1A         | 2205   | 4.97  | 6.36  | -1.39 | 0.00575 |
| RNF24          | 11237  | 6.52  | 7.18  | -0.66 | 0.00582 |
| WAC            | 51322  | 8.02  | 8.49  | -0.47 | 0.0059  |
| BID            | 637    | 8.81  | 9.36  | -0.56 | 0.006   |
| FLT3           | 2322   | 5.43  | 6.36  | -0.93 | 0.00616 |
| MTMR14         | 64419  | 7.39  | 7.85  | -0.46 | 0.00625 |
| PRKCE          | 5581   | 5.48  | 5.98  | -0.49 | 0.00625 |
| ZNF652         | 22834  | 5.99  | 6.85  | -0.85 | 0.00625 |
| CNOT8          | 9337   | 8.02  | 8.62  | -0.6  | 0.00637 |
| PTP4A2         | 8073   | 9.97  | 10.51 | -0.54 | 0.0066  |
| FLOT2          | 2319   | 7.64  | 8.29  | -0.65 | 0.00663 |
| CD11C          | 3687   | 9.01  | 9.9   | -0.89 | 0.00663 |
| NACA           | 4666   | 8.7   | 9.18  | -0.48 | 0.00663 |
| APOBR          | 55911  | 7.27  | 7.91  | -0.63 | 0.00681 |
| CA5B           | 11238  | 5.6   | 6.09  | -0.49 | 0.00683 |
| <b>CD52</b>    | 1043   | 10.72 | 11.48 | -0.76 | 0.00683 |
| KLF12          | 11278  | 5.48  | 6.26  | -0.78 | 0.00683 |
| FAM117A        | 81558  | 6.35  | 6.91  | -0.56 | 0.00687 |
| INSR           | 3643   | 6.55  | 7.2   | -0.65 | 0.00687 |
| NLRP1          | 22861  | 5.88  | 6.62  | -0.74 | 0.00693 |
| CS             | 1431   | 9.84  | 10.19 | -0.35 | 0.00711 |
| PELI2          | 57161  | 6.19  | 6.87  | -0.68 | 0.00739 |
| APAF1          | 317    | 7.06  | 7.65  | -0.6  | 0.00741 |
| MAP4K1         | 11184  | 6.29  | 7.04  | -0.76 | 0.00741 |
| GALNT3         | 2591   | 4.82  | 5.39  | -0.57 | 0.00741 |
| RASSF2         | 9770   | 7.71  | 8.46  | -0.75 | 0.0076  |
| EIF4B          | 1975   | 7.63  | 8.4   | -0.77 | 0.0076  |
| CPPED1         | 55313  | 7.23  | 8.05  | -0.82 | 0.0076  |
| <b>CCDC88C</b> | 440193 | 4.64  | 5.48  | -0.84 | 0.0076  |
| CD1C           | 911    | 6.2   | 7.52  | -1.31 | 0.0076  |
| PLP2           | 5355   | 9.74  | 10.44 | -0.7  | 0.00777 |
| PPM1F          | 9647   | 7.17  | 7.63  | -0.46 | 0.00781 |
| VPS51          | 738    | 8.27  | 8.71  | -0.44 | 0.00818 |
| RBL2           | 5934   | 6.79  | 7.34  | -0.55 | 0.00818 |
| IL16           | 3603   | 6.91  | 7.34  | -0.44 | 0.00912 |
| EIF3M          | 10480  | 9.05  | 9.61  | -0.56 | 0.00925 |
| ITPK1          | 3705   | 8.55  | 8.98  | -0.43 | 0.00926 |
| EIF3H          | 8667   | 7.3   | 7.86  | -0.55 | 0.00926 |

|                 |        |       |       |       |         |
|-----------------|--------|-------|-------|-------|---------|
| MEFV            | 4210   | 4.72  | 5.35  | -0.63 | 0.00931 |
| PRKCB           | 5579   | 6.61  | 7.54  | -0.93 | 0.00949 |
| ZBTB11          | 27107  | 7.77  | 8.24  | -0.47 | 0.00966 |
| UNC119          | 9094   | 7.54  | 7.98  | -0.44 | 0.00975 |
| PGLS            | 25796  | 8.03  | 8.59  | -0.55 | 0.00975 |
| STK17B          | 9262   | 7.68  | 8.45  | -0.78 | 0.00975 |
| ZDHHC18         | 84243  | 7.58  | 8.08  | -0.5  | 0.00991 |
| OXA1L           | 5018   | 9.68  | 10.07 | -0.39 | 0.00992 |
| GSE1            | 23199  | 7.04  | 7.61  | -0.57 | 0.01    |
| DNAJC4          | 3338   | 6.99  | 7.51  | -0.53 | 0.01007 |
| TKT             | 7086   | 9.12  | 9.79  | -0.67 | 0.01007 |
| GMFG            | 9535   | 10.23 | 10.68 | -0.46 | 0.01017 |
| RPL36           | 25873  | 9.89  | 10.32 | -0.43 | 0.01024 |
| TOB1            | 10140  | 8.36  | 9.23  | -0.87 | 0.01035 |
| RPS27           | 6232   | 8.08  | 8.48  | -0.41 | 0.0104  |
| NIN             | 51199  | 7.34  | 7.81  | -0.46 | 0.0104  |
| IMPA2           | 3613   | 6.92  | 7.57  | -0.64 | 0.0104  |
| <b>CDC42EP3</b> | 10602  | 7.41  | 8.31  | -0.9  | 0.0104  |
| CDKN1B          | 1027   | 9.32  | 9.83  | -0.51 | 0.01092 |
| CAT             | 847    | 8.61  | 9.31  | -0.7  | 0.01099 |
| ESYT1           | 23344  | 9.09  | 9.58  | -0.48 | 0.01101 |
| FDFT1           | 2222   | 8.65  | 9.2   | -0.55 | 0.01123 |
| DGKE            | 8526   | 4.68  | 5.18  | -0.5  | 0.01138 |
| FBL             | 2091   | 9.28  | 9.73  | -0.45 | 0.01139 |
| AGTPBP1         | 23287  | 7.8   | 8.33  | -0.53 | 0.01162 |
| ATP2A3          | 489    | 5.71  | 6.32  | -0.61 | 0.0118  |
| CORO1A          | 11151  | 8.09  | 8.87  | -0.78 | 0.01185 |
| 9月-09           | 10801  | 6     | 6.57  | -0.57 | 0.01194 |
| SIK3            | 23387  | 6.15  | 6.75  | -0.59 | 0.01194 |
| KAT6A           | 7994   | 6.87  | 7.28  | -0.41 | 0.01196 |
| RSL1D1          | 26156  | 7.61  | 8.09  | -0.48 | 0.012   |
| C1RL            | 51279  | 6.47  | 7.17  | -0.69 | 0.012   |
| GABBR1          | 2550   | 5.84  | 6.38  | -0.54 | 0.012   |
| <b>CAPN2</b>    | 824    | 9.86  | 10.6  | -0.74 | 0.01213 |
| XYLT1           | 64131  | 6.58  | 7.39  | -0.82 | 0.01219 |
| NDUFA10         | 4705   | 8.51  | 8.94  | -0.43 | 0.01226 |
| MPHOSPH9        | 10198  | 6.25  | 6.74  | -0.5  | 0.01241 |
| NDST1           | 3340   | 6.13  | 6.6   | -0.47 | 0.0126  |
| C20orf27        | 54976  | 6.14  | 6.75  | -0.61 | 0.0132  |
| PTPN6           | 5777   | 9.75  | 10.27 | -0.52 | 0.01332 |
| NAP1L1          | 4673   | 9.09  | 9.66  | -0.57 | 0.01333 |
| PSIP1           | 11168  | 6.76  | 7.39  | -0.63 | 0.01348 |
| MAN2A2          | 4122   | 6.98  | 7.41  | -0.43 | 0.01348 |
| ACAP1           | 9744   | 5.72  | 6.32  | -0.6  | 0.01348 |
| ZNF467          | 168544 | 5.78  | 6.22  | -0.43 | 0.01351 |
| SLC9A3R1        | 9368   | 7.68  | 8.15  | -0.46 | 0.01354 |
| CERK            | 64781  | 7.72  | 8.18  | -0.46 | 0.01361 |
| PDE4A           | 5141   | 6.02  | 6.65  | -0.63 | 0.01363 |
| RBM3            | 5935   | 6.88  | 7.39  | -0.51 | 0.01376 |
| RFX7            | 64864  | 7.23  | 7.67  | -0.44 | 0.01383 |
| ELF4            | 2000   | 8.01  | 8.46  | -0.45 | 0.01404 |

|          |       |      |       |       |         |
|----------|-------|------|-------|-------|---------|
| CDKN2D   | 1032  | 5.96 | 6.42  | -0.46 | 0.01414 |
| ROGDI    | 79641 | 7    | 7.55  | -0.55 | 0.01425 |
| FLNA     | 2316  | 8.08 | 8.82  | -0.74 | 0.01475 |
| WDR48    | 57599 | 7.3  | 7.76  | -0.47 | 0.01514 |
| FAM60A   | 58516 | 6.69 | 7.26  | -0.56 | 0.01514 |
| CASP1    | 834   | 8.6  | 9.42  | -0.83 | 0.01539 |
| AIP      | 9049  | 7.26 | 7.69  | -0.43 | 0.01541 |
| TESC     | 54997 | 5.29 | 6.02  | -0.73 | 0.01545 |
| LCP1     | 3936  | 11.4 | 11.85 | -0.45 | 0.01549 |
| CYLD     | 1540  | 8.07 | 8.54  | -0.47 | 0.01549 |
| RARA     | 5914  | 6.19 | 6.9   | -0.71 | 0.01549 |
| NEK9     | 91754 | 7.55 | 7.92  | -0.38 | 0.01551 |
| VCL      | 7414  | 8.14 | 8.85  | -0.71 | 0.01552 |
| ABCA7    | 10347 | 6.27 | 6.69  | -0.42 | 0.0158  |
| IL18R1   | 8809  | 4.28 | 4.92  | -0.64 | 0.01618 |
| ADRBK2   | 157   | 8.19 | 8.64  | -0.46 | 0.01621 |
| RUNX3    | 864   | 7.46 | 8.11  | -0.65 | 0.01656 |
| CCNG1    | 900   | 9    | 9.48  | -0.47 | 0.01661 |
| SCRN1    | 9805  | 7.57 | 8.2   | -0.62 | 0.01661 |
| AHCYL2   | 23382 | 6.29 | 6.7   | -0.41 | 0.0167  |
| PHF17    | 79960 | 5.83 | 6.32  | -0.48 | 0.01672 |
| SETD2    | 29072 | 6.14 | 6.55  | -0.41 | 0.01732 |
| PCYOX1L  | 78991 | 7.21 | 7.7   | -0.48 | 0.01765 |
| AES      | 166   | 7.76 | 8.22  | -0.46 | 0.01788 |
| PLAC8    | 51316 | 7.56 | 8.84  | -1.28 | 0.01792 |
| SULT1B1  | 27284 | 5.2  | 5.7   | -0.5  | 0.01799 |
| RIN3     | 79890 | 7.1  | 7.8   | -0.7  | 0.01799 |
| RPS21    | 6227  | 8.66 | 9.04  | -0.37 | 0.01818 |
| RAP1GAP2 | 23108 | 6.44 | 7.05  | -0.61 | 0.01826 |
| DHPS     | 1725  | 7.38 | 7.8   | -0.42 | 0.01832 |
| PITPNM1  | 9600  | 6.47 | 6.91  | -0.44 | 0.01837 |
| VRK1     | 7443  | 7.18 | 7.63  | -0.45 | 0.0186  |
| ADAP1    | 11033 | 7.48 | 7.96  | -0.48 | 0.0187  |
| ATP11B   | 23200 | 6.42 | 6.91  | -0.49 | 0.01883 |
| TUBA4A   | 7277  | 7.17 | 7.76  | -0.58 | 0.01891 |
| WDR82    | 80335 | 9.5  | 9.87  | -0.37 | 0.01893 |
| FRAT2    | 23401 | 7.63 | 8.08  | -0.45 | 0.01898 |
| ZFAND1   | 79752 | 7.27 | 7.75  | -0.48 | 0.01902 |
| LRMP     | 4033  | 7.08 | 7.76  | -0.68 | 0.01971 |
| CPSF6    | 11052 | 6.52 | 6.97  | -0.45 | 0.01987 |
| CD207    | 50489 | 4.71 | 5.56  | -0.85 | 0.01987 |
| C11orf21 | 29125 | 5.58 | 6.4   | -0.82 | 0.01998 |
| SRRM1    | 10250 | 8.61 | 8.93  | -0.32 | 0.02036 |
| BRD3     | 8019  | 7.75 | 8.11  | -0.36 | 0.02036 |
| SERTAD2  | 9792  | 9.21 | 9.6   | -0.38 | 0.02036 |
| STAG3L4  | 64940 | 6.24 | 6.69  | -0.44 | 0.02036 |
| DHTKD1   | 55526 | 6.23 | 6.7   | -0.47 | 0.02036 |
| NONO     | 4841  | 8.29 | 8.69  | -0.4  | 0.02066 |
| TBL1X    | 6907  | 6.31 | 7.09  | -0.78 | 0.02072 |
| EIF2S3   | 1968  | 7.6  | 8.33  | -0.72 | 0.02081 |
| LRBA     | 987   | 6.61 | 7.11  | -0.5  | 0.02107 |

|          |        |      |       |       |         |
|----------|--------|------|-------|-------|---------|
| VAMP2    | 6844   | 6.94 | 7.38  | -0.43 | 0.02115 |
| MKNK2    | 2872   | 8.6  | 9.08  | -0.48 | 0.02128 |
| STAG2    | 10735  | 7.95 | 8.44  | -0.48 | 0.0214  |
| FMNL1    | 752    | 7.5  | 8.02  | -0.53 | 0.0214  |
| ELF2     | 1998   | 6.53 | 6.98  | -0.44 | 0.02167 |
| SETBP1   | 26040  | 5.3  | 5.74  | -0.45 | 0.02167 |
| MYO1F    | 4542   | 9.27 | 9.75  | -0.48 | 0.02167 |
| SPATA6   | 54558  | 5.31 | 5.84  | -0.54 | 0.02225 |
| DAPP1    | 27071  | 7.76 | 8.38  | -0.63 | 0.02236 |
| IDH3A    | 3419   | 8.05 | 8.51  | -0.46 | 0.02244 |
| TMEM104  | 54868  | 6.98 | 7.35  | -0.37 | 0.02255 |
| MBNL3    | 55796  | 7.27 | 7.75  | -0.48 | 0.02255 |
| CCNI     | 10983  | 8.1  | 8.64  | -0.54 | 0.02255 |
| ZNF318   | 24149  | 6.89 | 7.28  | -0.39 | 0.02257 |
| RASGRP2  | 10235  | 5.83 | 6.4   | -0.57 | 0.02257 |
| PYCARD   | 29108  | 9.79 | 10.25 | -0.46 | 0.02272 |
| BACH2    | 60468  | 4.11 | 4.46  | -0.35 | 0.02296 |
| STAT5B   | 6777   | 6.81 | 7.19  | -0.38 | 0.02348 |
| C6orf48  | 50854  | 8.36 | 8.91  | -0.55 | 0.0235  |
| ARF5     | 381    | 7.99 | 8.36  | -0.37 | 0.02353 |
| RPS27A   | 6233   | 8.58 | 8.97  | -0.39 | 0.02372 |
| MEF2D    | 4209   | 6.9  | 7.3   | -0.4  | 0.02378 |
| MEX3C    | 51320  | 6.84 | 7.35  | -0.52 | 0.02378 |
| CELF2    | 10659  | 8.11 | 8.69  | -0.57 | 0.02387 |
| GDI2     | 2665   | 9.76 | 10.23 | -0.47 | 0.02409 |
| OSBPL8   | 114882 | 7.37 | 8.09  | -0.72 | 0.02484 |
| GID8     | 54994  | 8.29 | 8.65  | -0.36 | 0.02508 |
| MAP2K3   | 5606   | 7.4  | 7.97  | -0.57 | 0.02535 |
| IPCEF1   | 26034  | 5.85 | 6.52  | -0.66 | 0.02576 |
| ARAF     | 369    | 7.87 | 8.23  | -0.36 | 0.02606 |
| CCDC69   | 26112  | 6.21 | 6.83  | -0.61 | 0.02606 |
| FRY      | 10129  | 6.65 | 7.45  | -0.81 | 0.02606 |
| SNRK     | 54861  | 8.11 | 8.56  | -0.46 | 0.02618 |
| SVIL     | 6840   | 6.72 | 7.43  | -0.71 | 0.02618 |
| SPINT1   | 6692   | 7.23 | 7.74  | -0.51 | 0.02656 |
| AFF3     | 3899   | 4.84 | 5.46  | -0.62 | 0.02656 |
| ARHGEF6  | 9459   | 9.37 | 9.79  | -0.42 | 0.02686 |
| CREBBP   | 1387   | 7.33 | 7.67  | -0.34 | 0.02705 |
| VEZF1    | 7716   | 8.31 | 8.75  | -0.44 | 0.02736 |
| DIAPH1   | 1729   | 8.1  | 8.56  | -0.46 | 0.02736 |
| CHST2    | 9435   | 6.02 | 6.57  | -0.55 | 0.02736 |
| CDC40    | 51362  | 6.68 | 7.1   | -0.42 | 0.02849 |
| RPL14    | 9045   | 8.91 | 9.39  | -0.48 | 0.02868 |
| RMND5A   | 64795  | 6.93 | 7.34  | -0.41 | 0.02929 |
| CIDEB    | 27141  | 6.96 | 7.42  | -0.46 | 0.02941 |
| LIMD1    | 8994   | 6.89 | 7.33  | -0.44 | 0.03059 |
| CHAF1A   | 10036  | 5.81 | 6.14  | -0.33 | 0.03059 |
| TP53     | 7157   | 6.67 | 7.15  | -0.48 | 0.03059 |
| BAG1     | 573    | 7.88 | 8.28  | -0.4  | 0.03104 |
| INPP5F   | 22876  | 5.84 | 6.35  | -0.51 | 0.03104 |
| TRAPPC6A | 79090  | 7.42 | 7.81  | -0.38 | 0.03112 |

|          |        |       |       |       |         |
|----------|--------|-------|-------|-------|---------|
| ANP32A   | 8125   | 8.95  | 9.35  | -0.4  | 0.03123 |
| SLC12A6  | 9990   | 6.86  | 7.43  | -0.57 | 0.03215 |
| PMS2P1   | 5379   | 6.89  | 7.3   | -0.41 | 0.03272 |
| RNF126   | 55658  | 6.92  | 7.3   | -0.37 | 0.03289 |
| BPTF     | 2186   | 5.81  | 6.14  | -0.34 | 0.03306 |
| SELL     | 6402   | 6.73  | 7.49  | -0.76 | 0.03327 |
| PNRC2    | 55629  | 8.69  | 9.05  | -0.36 | 0.03354 |
| VIPR1    | 7433   | 5.58  | 6.08  | -0.5  | 0.03366 |
| TMEM8B   | 51754  | 5.77  | 6.19  | -0.42 | 0.03369 |
| SLC25A40 | 55972  | 8.48  | 8.96  | -0.48 | 0.03369 |
| NADSYN1  | 55191  | 7.96  | 8.31  | -0.35 | 0.03371 |
| PPP3CA   | 5530   | 8.44  | 8.9   | -0.47 | 0.03383 |
| NCF2     | 4688   | 10.88 | 11.37 | -0.48 | 0.03383 |
| ZNF592   | 9640   | 7.31  | 7.65  | -0.34 | 0.03388 |
| TMEM66   | 51669  | 7.54  | 7.91  | -0.37 | 0.0344  |
| IRF4     | 3662   | 5.92  | 6.57  | -0.65 | 0.03444 |
| LSM6     | 11157  | 8.82  | 9.2   | -0.38 | 0.03475 |
| POLR1E   | 64425  | 5.27  | 5.6   | -0.34 | 0.03482 |
| URI1     | 8725   | 7.23  | 7.63  | -0.4  | 0.03482 |
| TNKS2    | 80351  | 7.94  | 8.39  | -0.46 | 0.03482 |
| STK24    | 8428   | 8.35  | 8.69  | -0.34 | 0.03482 |
| LIG3     | 3980   | 5.93  | 6.26  | -0.33 | 0.03497 |
| HIVEP1   | 3096   | 6.93  | 7.49  | -0.56 | 0.03511 |
| FAM168B  | 130074 | 7.59  | 8     | -0.41 | 0.03547 |
| SLC38A1  | 81539  | 5.58  | 6.49  | -0.92 | 0.03584 |
| SPIB     | 6689   | 5.16  | 5.66  | -0.5  | 0.03589 |
| SLCO3A1  | 28232  | 7.28  | 7.88  | -0.6  | 0.03598 |
| CYFIP2   | 26999  | 6.5   | 7.21  | -0.7  | 0.03598 |
| AMPD2    | 271    | 7.62  | 8.22  | -0.6  | 0.0363  |
| DCLRE1C  | 64421  | 6.68  | 7.08  | -0.4  | 0.03652 |
| NFE2     | 4778   | 4.43  | 4.95  | -0.52 | 0.03652 |
| CARS2    | 79587  | 8.43  | 8.78  | -0.35 | 0.03687 |
| G3BP2    | 9908   | 8.25  | 8.62  | -0.37 | 0.03738 |
| PPP6C    | 5537   | 8.9   | 9.26  | -0.36 | 0.03765 |
| SLC25A28 | 81894  | 7.5   | 7.91  | -0.41 | 0.03765 |
| RSL24D1  | 51187  | 9.06  | 9.46  | -0.41 | 0.03801 |
| MTMR1    | 8776   | 7.46  | 8     | -0.54 | 0.03801 |
| RPS6KA3  | 6197   | 9     | 9.41  | -0.41 | 0.03837 |
| NCOA1    | 8648   | 8.07  | 8.44  | -0.37 | 0.03845 |
| EPB41    | 2035   | 6.1   | 6.49  | -0.4  | 0.03845 |
| RPL23A   | 6147   | 9.34  | 9.79  | -0.45 | 0.03845 |
| 9月-06    | 23157  | 7.3   | 7.79  | -0.48 | 0.03845 |
| LST1     | 7940   | 9.87  | 10.42 | -0.55 | 0.03845 |
| PACS1    | 55690  | 6.94  | 7.27  | -0.33 | 0.0385  |
| LNPEP    | 4012   | 7.13  | 7.65  | -0.53 | 0.03871 |
| RCOR1    | 23186  | 7.83  | 8.17  | -0.34 | 0.03919 |
| OBFC1    | 79991  | 6.69  | 7.02  | -0.34 | 0.03919 |
| CASP2    | 835    | 5.73  | 6.14  | -0.41 | 0.03919 |
| USP48    | 84196  | 6.51  | 6.85  | -0.34 | 0.03928 |
| IFT20    | 90410  | 8.71  | 9.13  | -0.42 | 0.03928 |
| SCAF4    | 57466  | 6.47  | 6.9   | -0.43 | 0.03936 |

|              |       |       |       |       |         |
|--------------|-------|-------|-------|-------|---------|
| CBX7         | 23492 | 6.92  | 7.28  | -0.36 | 0.03955 |
| RGS14        | 10636 | 5.77  | 6.15  | -0.38 | 0.03997 |
| NAAA         | 27163 | 7.98  | 8.49  | -0.52 | 0.04045 |
| CHP1         | 11261 | 7.62  | 8.04  | -0.42 | 0.04045 |
| SLC25A38     | 54977 | 7.26  | 7.59  | -0.33 | 0.04047 |
| MKL1         | 57591 | 7.13  | 7.5   | -0.37 | 0.04047 |
| LSM7         | 51690 | 8.42  | 8.79  | -0.38 | 0.04047 |
| EFHD2        | 79180 | 9.56  | 10.01 | -0.46 | 0.04062 |
| ZBTB33       | 10009 | 8.84  | 9.18  | -0.34 | 0.04082 |
| SH2D3C       | 10044 | 5.5   | 6.01  | -0.51 | 0.04133 |
| CD1E         | 913   | 4.58  | 5.72  | -1.14 | 0.04144 |
| C2orf49      | 79074 | 5.79  | 6.1   | -0.31 | 0.04147 |
| PDE6G        | 5148  | 6.41  | 6.77  | -0.36 | 0.04155 |
| CRBN         | 51185 | 8.36  | 8.75  | -0.4  | 0.04155 |
| CLEC4A       | 50856 | 7.78  | 8.56  | -0.77 | 0.04155 |
| <b>IRAK3</b> | 11213 | 7.18  | 8.02  | -0.84 | 0.04155 |
| NOTCH2       | 4853  | 8.19  | 8.73  | -0.54 | 0.04161 |
| KCTD15       | 79047 | 4.8   | 5.28  | -0.47 | 0.04203 |
| SMARCC1      | 6599  | 7.39  | 7.75  | -0.35 | 0.04211 |
| BCL2L13      | 23786 | 6.48  | 6.82  | -0.35 | 0.04214 |
| KDM4B        | 23030 | 7.02  | 7.38  | -0.36 | 0.04241 |
| SLC25A12     | 8604  | 6.28  | 6.62  | -0.34 | 0.04242 |
| ERLIN2       | 11160 | 6.42  | 6.85  | -0.44 | 0.04242 |
| KLF13        | 51621 | 7.21  | 7.74  | -0.54 | 0.04242 |
| CD37         | 951   | 9.15  | 9.74  | -0.59 | 0.04242 |
| U2SURP       | 23350 | 6.31  | 6.79  | -0.48 | 0.04251 |
| MAML3        | 55534 | 5.91  | 6.43  | -0.52 | 0.04256 |
| ZNF281       | 23528 | 7.48  | 7.86  | -0.39 | 0.04402 |
| RFTN1        | 23180 | 8.65  | 9.08  | -0.43 | 0.04425 |
| C21orf91     | 54149 | 6.51  | 6.98  | -0.47 | 0.04425 |
| ANAPC15      | 25906 | 7.64  | 7.99  | -0.35 | 0.04443 |
| UQCRB        | 7381  | 6.38  | 6.75  | -0.37 | 0.04443 |
| PLCB2        | 5330  | 8.01  | 8.41  | -0.4  | 0.04443 |
| AKIRIN1      | 79647 | 7.91  | 8.35  | -0.44 | 0.04443 |
| STK4         | 6789  | 7.23  | 7.79  | -0.56 | 0.04443 |
| METTL9       | 51108 | 8.88  | 9.4   | -0.52 | 0.04447 |
| PHF20        | 51230 | 7.39  | 7.84  | -0.45 | 0.04452 |
| IPO5         | 3843  | 7.6   | 8.06  | -0.46 | 0.04487 |
| CBX4         | 8535  | 7.15  | 7.56  | -0.41 | 0.04535 |
| RSBN1        | 54665 | 7.42  | 7.85  | -0.43 | 0.04573 |
| SLC1A5       | 6510  | 7.39  | 7.8   | -0.4  | 0.04585 |
| LANCL1       | 10314 | 7.85  | 8.21  | -0.36 | 0.04716 |
| ATPAF2       | 91647 | 6.47  | 6.81  | -0.33 | 0.04729 |
| HNRNPUL1     | 11100 | 7.95  | 8.31  | -0.36 | 0.04729 |
| ZMIZ1        | 57178 | 8.79  | 9.11  | -0.32 | 0.04753 |
| SCN9A        | 6335  | 3.97  | 4.4   | -0.44 | 0.04753 |
| OGT          | 8473  | 6.57  | 7.18  | -0.61 | 0.04768 |
| KLHDC2       | 23588 | 8.3   | 8.68  | -0.39 | 0.04794 |
| TMPO         | 7112  | 7.13  | 7.65  | -0.52 | 0.04844 |
| EVI2B        | 2124  | 11.04 | 11.39 | -0.36 | 0.04884 |
| KDM5A        | 5927  | 6.64  | 7.03  | -0.39 | 0.04884 |

|        |       |      |       |       |         |
|--------|-------|------|-------|-------|---------|
| UQCRC2 | 7385  | 6.85 | 7.21  | -0.36 | 0.04892 |
| FXYD5  | 53827 | 9.88 | 10.31 | -0.43 | 0.04892 |
| CBX6   | 23466 | 7.35 | 7.72  | -0.38 | 0.04939 |
| DDX46  | 9879  | 7.73 | 8.06  | -0.33 | 0.0495  |
| ADRBK1 | 156   | 7.28 | 7.7   | -0.42 | 0.04983 |
