# Supplementary material for: Dendritic Cells or Macrophages? The Microenvironment of Human Clear Cell Renal Cell Carcinoma Imprints a Mosaic Myeloid Subtype Associated with Patient Survival
Source: MDPI journal article supplement (doi:10.3390/cells11203289), 2022-10-19
Supplement: s1 [file s1]

# Dendritic cells or macrophages? The microenvironment of human clear cell renal cell carcinoma imprints a mosaic myeloid subtype associated with patient survival

Dorothee Brech<sup>1, §</sup>, Anna S. Herbstritt<sup>1, +</sup>, Sarah Diederich<sup>1, +</sup>, Tobias Straub<sup>2</sup>, Evangelos Kokolakis<sup>1</sup>, Martin Irmeler<sup>3</sup>, Johannes Beckers<sup>3, 4, 5</sup>, Florian A. Büttner<sup>6, 7</sup>, Elke Schaeffeler<sup>6, 7</sup>, Stefan Winter<sup>6, 7</sup>, Matthias Schwab<sup>6, 7, 8, 9</sup>, Peter J. Nelson<sup>10</sup> and Elfriede Noessner<sup>1, \*</sup>

<sup>1</sup> Immunoanalytics/Tissue Control of Immunocytes, Helmholtz Zentrum München, Neuherberg, Germany

<sup>2</sup> Bioinformatics Core Unit, Biomedical Center, Ludwig-Maximilians-University, Munich, Germany

<sup>3</sup> Institute of Experimental Genetics, Helmholtz Zentrum München, Neuherberg, Germany

<sup>4</sup> German Center for Diabetes Research (DZD), Munich, Germany

<sup>5</sup> Chair of Experimental Genetics, Technical University of Munich, Freising, Germany

<sup>6</sup> Dr. Margarete Fischer-Bosch-Institute of Clinical Pharmacology, Stuttgart, Germany

<sup>7</sup> University of Tuebingen, Tuebingen, Germany

<sup>8</sup> Department of Clinical Pharmacology and Department of Pharmacy and Biochemistry, University of Tuebingen, Tuebingen, Germany

<sup>9</sup> German Cancer Consortium (DKTK) and German Cancer Research Center (DKFZ), Heidelberg, Tübingen, Germany

<sup>10</sup> Medizinische Klinik und Poliklinik IV, University of Munich, Munich, Germany

\*Correspondence: [noessner@helmholtz-muenchen.de](mailto:noessner@helmholtz-muenchen.de).

§ current affiliation: Bristol-Myers Squibb GmbH & Co. KGaA, Arnulfstraße 29, 80636 Munich, Germany

+ These authors contributed equally to this work.

## Supplemental figures and legends

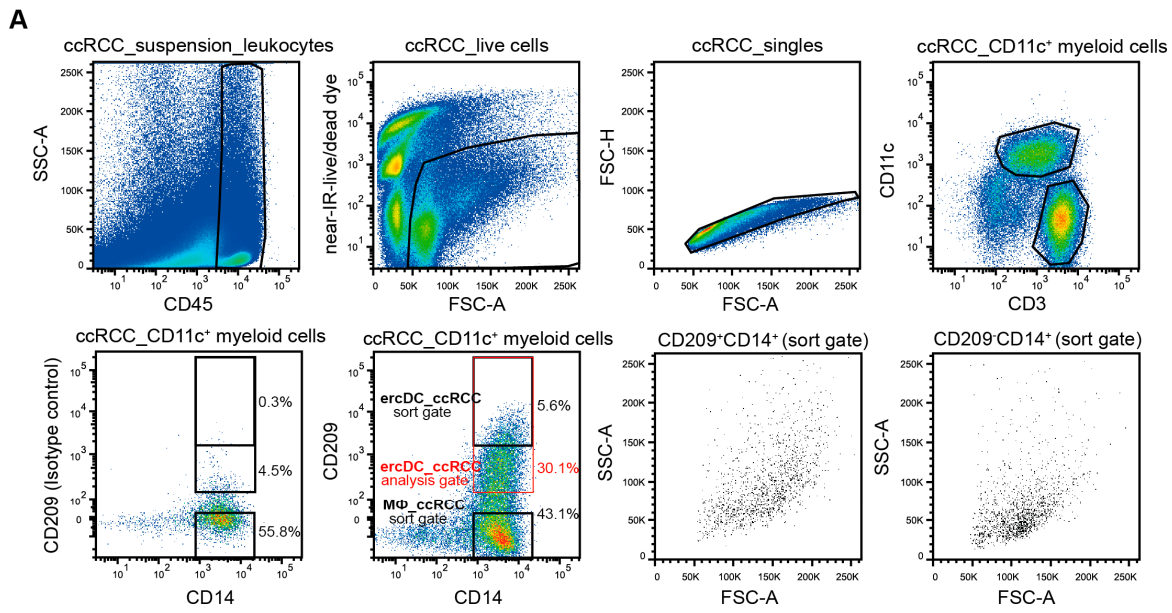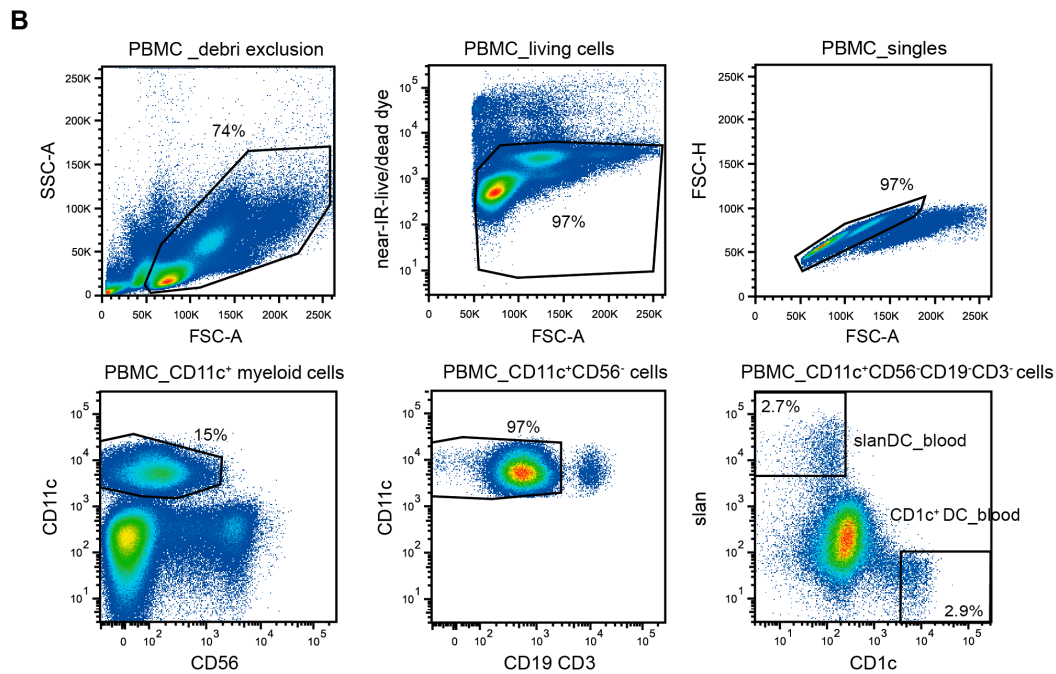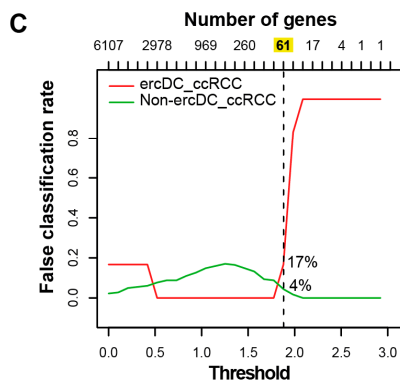

**Figure S1: Gating strategy for the sorting of ercDCs and macrophages from ccRCC tissue cell suspension, CD1c<sup>+</sup> DCs and slanDCs from PBMCs (blood of healthy donors) and cross-validation of ercDC\_ccRCC marker genes. Cross-validation related to figure 4A.** (A) ErcDCs and macrophages were sorted from ccRCC tissue-cell-suspensions stained with antibody combination CD45-PeCy7, CD11c-APC, CD3-PB, CD209-PE (all BD Biosciences), CD14-PerCPCy5.5 (eBioscience), LIVE/DEAD® Fixable Near-IR Dead Cell Stain Kit (Thermo Fisher Scientific). (B) Sorting strategy for CD1c<sup>+</sup> DC and slanDCs from PBMCs of blood of healthy human donors. CD19/CD56-depleted PBMCs were stained with antibody combination anti-CD11c-PE, anti-CD3-PB (all BD Biosciences), anti-CD56-APC (Beckman Coulter), anti-CD19-PB (Dako), anti-CD1c-PeCy7 (Biolegend), anti-slan-FITC (Miltenyi Biotec) and LIVE/DEAD® Fixable Near-IR Dead Cell Stain Kit (Thermo Fisher Scientific). CD11c<sup>+</sup> myeloid cells were selected after gating on CD45<sup>+</sup> leukocytes, live and single cells. CD1c<sup>+</sup> DCs and slanDCs were sorted from gated CD11c<sup>+</sup>CD56<sup>-</sup>CD19<sup>-</sup>CD3<sup>-</sup> cells on the basis of the marker CD1c and slan, respectively. Positivity of both markers was identified with isotype control (not shown). Cell types were selected as following: CD45<sup>+</sup> leukocytes were selected in dot plots against SSC, dead cells and doublets were excluded and myeloid cells were selected by CD11c and exclusion of CD3. ErcDCs were selected as CD209 and CD14 co-expressing cells among gated live CD11c<sup>+</sup> CD3<sup>-</sup> cells. Macrophages within the tissue cell suspension were selected as CD209<sup>+</sup>CD14<sup>+</sup> cells among gated CD45<sup>+</sup> live single CD11c<sup>+</sup> CD3<sup>-</sup> cells. ErcDCs had a larger size (FSC-A) and granularity (SSC-A) than corresponding macrophages. CD209 positivity was judged with the help of an isotype control, CD14 positivity through CD14<sup>+</sup> monocytes within PBMC (not shown). Sorts used BD Aria IIIu flow cytometer with 100 µm nozzle and instrument settings modi “purity” or “single cell”. (C) Cross-validated misclassification error curves of the nearest shrunken centroid classifier. Depicted are the cross-validation errors for the training set at 30 different threshold levels of shrinkage. The training set comprised 6 ercDC\_ccRCC and 182 non-ercDC\_ccRCC samples (green line, contains all cell types used in figure 4A). The number of discriminative genes as a function of threshold level in the classifier is indicated on top of the panel. The threshold for defining the set of 61 ercDC\_ccRCC marker genes (dashed line) classifier was set in a way that a preferably small group of genes was chosen and the false negative classification rate was below 20 % while the false positive one was below 5%.

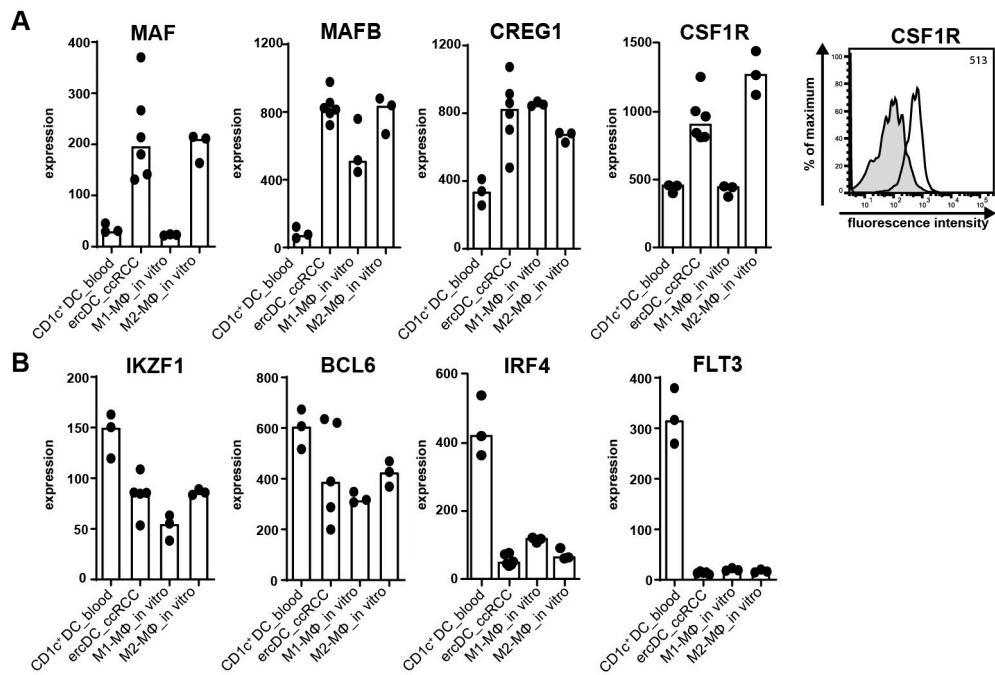

**Figure S2: DC- and macrophage-associated genes in ercDCs.** (A) Gene expression of macrophage-associated transcription factors and growth factor receptor CSF1R. Bars: median of each group, symbols correspond to individual array replicates of a cell type. Histogram depicts surface expression of CSF1R on ercDCs of cCRC tissue cell suspensions by flow cytometry (B) Linear expression of genes for DC-associated transcription factors and growth factor receptor FLT3.

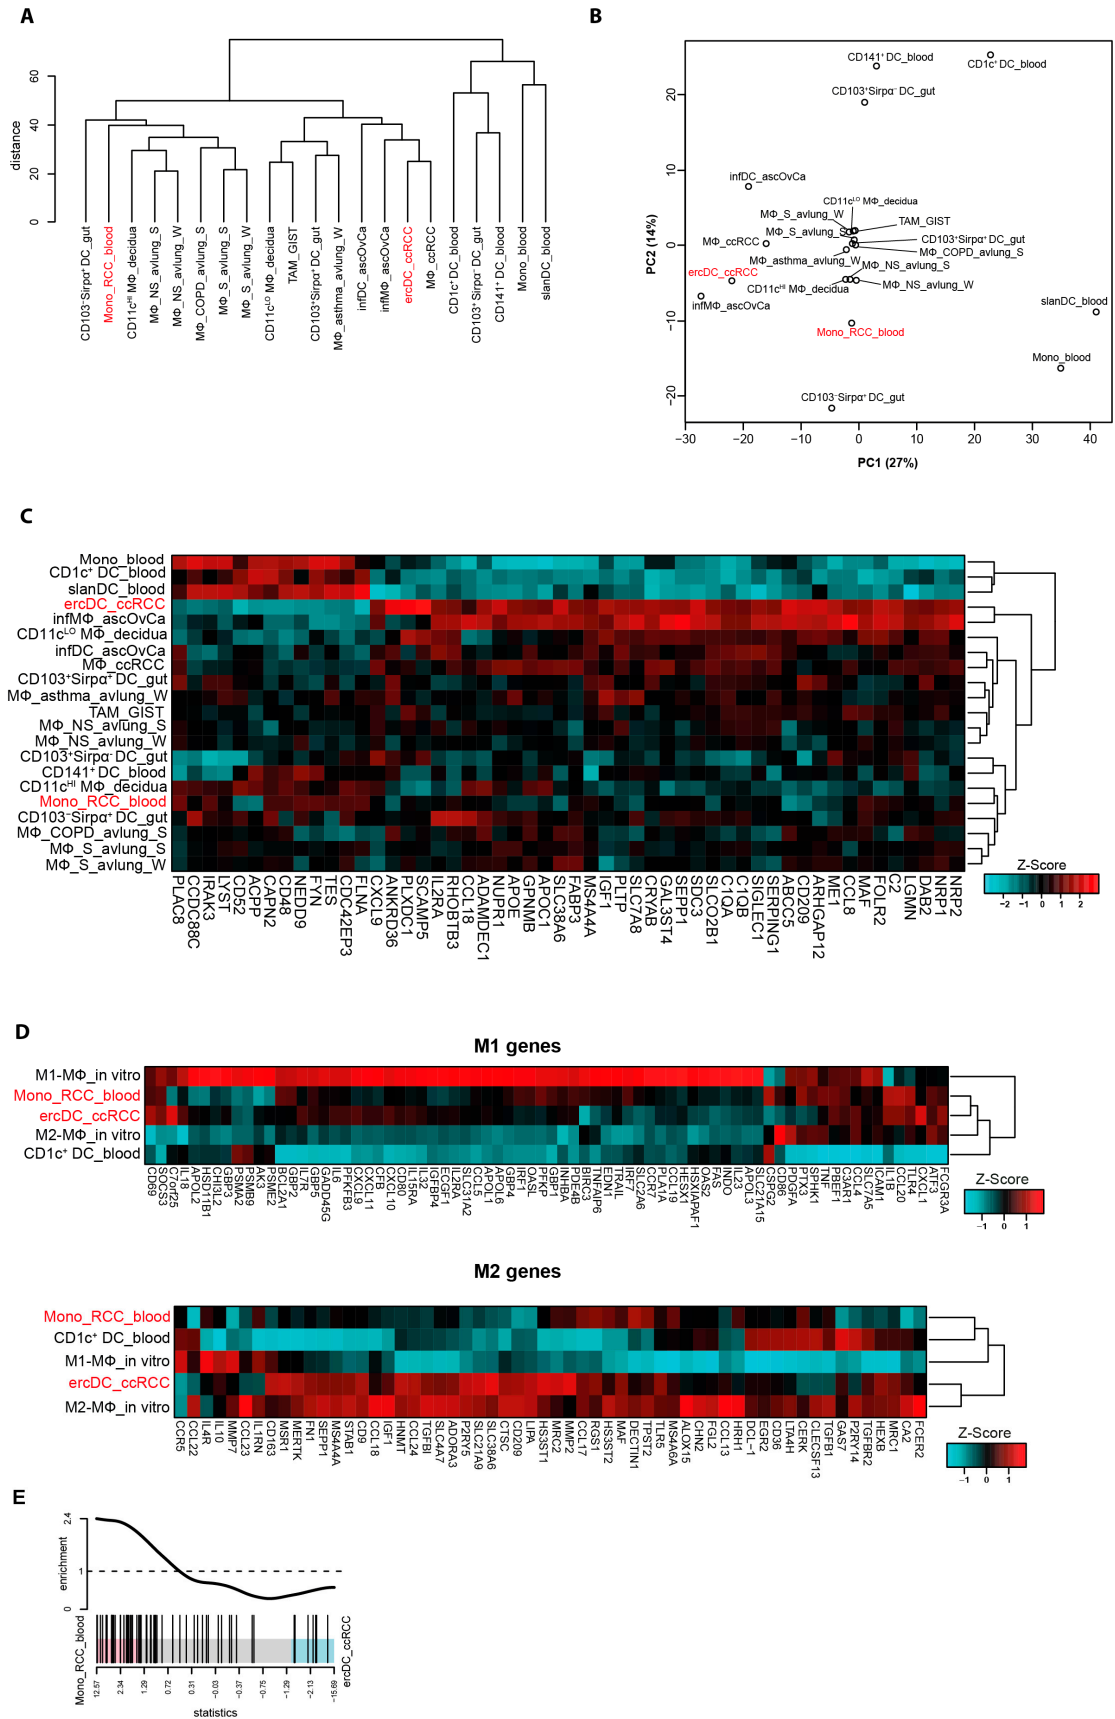

**Figure S3: Transcriptome comparison of monocytes from blood of RCC patients with ercDCs from ccRCC tissues and myeloid cells from non-lymphoid tissues after depletion of blood-specific genes.** Related to figure 6. Figures are calculated based on expression levels with blood-specific genes excluded. The list of blood-specific genes was from the tissue preferential expressed gene list (blood genes) [86]. (A) Hierarchical clustering of indicated cell types based on median expression values of replicate samples considering only “informative” genes (B) PCA on data set shown in (A) depicting the first two PCs that describe 27% and 14% of the variance. (C) Heatmap comparing ercDC\_ccRCC marker genes (generated with NSCM [34]) with blood monocytes of RCC patients (Mono\_RCC\_blood) [85]. Relative expression levels (z-score) of the 61 marker genes are shown. (D) Heatmap showing relative expression levels of genes associated with M1- and M2-macrophages in Mono\_RCC\_blood and ercDC\_ccRCC. (E) Enrichment plot for 73 IL-1R pathway genes defined by merging MSigDB sets “BIOCARTA\_IL1R\_PATHWAY”, “REACTOME\_IL1\_SIGNALING”,

“PID\_IL1\_PATHWAY” and “INTERLEUKIN\_1\_SECRETION”. Genes indicated by vertical bars are spread along the x-axis based on t-statistic comparing ercDC\_ccRCC and Mono\_RCC\_blood cells. Enrichment worm on top shows the relative enrichment of genes in each part of the plot.

#### Supplemental tables

**Table S1: ccRCC tissues.** Samples were obtained anonymously with pathologic tumor description but without specification of personal data.

| Patient-ID | TNM classification <sup>a</sup> | Gender |
|------------|---------------------------------|--------|
| RCC-DD1*   | n.a.                            | n.a.   |
| RCC-DD2*   | n.a.                            | n.a.   |
| RCC42      | pT3b pN0 G3                     | Female |
| RCC66*     | pT3a pN0 M1 G3                  | Male   |
| RCC69      | pT3a pN0 (0/4) G2               | Female |
| RCC71      | pT3a pN0 G2                     | Female |
| RCC74*     | pT1a pN0 G1                     | Male   |
| RCC89*     | pT3a pNX G2                     | Female |
| RCC90      | pT1a pNX G2                     | Male   |
| RCC91*     | pT3a pNX G3                     | Male   |
| RCC94*     | pT1b pN0 G2                     | Female |
| RCC97*     | pT2b pN0 G2                     | Female |
| RCC105     | pT3a pNX G3                     | Male   |
| RCC114     | pT3c pN0 G2                     | Male   |
| RCC118     | at least pT3b pN0 G3            | Male   |

<sup>a</sup> Classification according to Union International Contre le Cancer (UICC), T: primary tumor size, N: lymph node involvement, M: distant metastasis;

\* ccRCC tissues used for gene expression analysis

**Table S2A: Myeloid cell types used for Affymetrix arrays (in-house generated data sets).**

| Cell type                    | Origin           | Name                       | Marker profile                                                | Replicates                | RNA RIN | (Sorted) total cell number |
|------------------------------|------------------|----------------------------|---------------------------------------------------------------|---------------------------|---------|----------------------------|
| <b>ercDC</b>                 | ccRCC tissue     | ercDC_ccRCC                | CD11c <sup>+</sup><br>CD209 <sup>+</sup><br>CD14 <sup>+</sup> | RCC66                     | 8.6     | 2.1 x 10 <sup>4</sup>      |
|                              |                  |                            |                                                               | RCC74                     | 6.1     | 1.7 x 10 <sup>4</sup>      |
|                              |                  |                            |                                                               | RCC89                     | 8.0     | 9.5 x 10 <sup>4</sup>      |
|                              |                  |                            |                                                               | RCC91                     | 8.0     | 1.1 x 10 <sup>4</sup>      |
|                              |                  |                            |                                                               | RCC94                     | 6.7     | 1.1 x 10 <sup>4</sup>      |
|                              |                  |                            |                                                               | RCC-DD2                   | 5.6     | 0.7 x 10 <sup>4</sup>      |
| <b>MΦ</b>                    | ccRCC tissue     | MΦ_ccRCC                   | CD11c <sup>+</sup><br>CD209 <sup>+</sup><br>CD14 <sup>+</sup> | RCC66                     | 8.8     | 6.0 x 10 <sup>4</sup>      |
|                              |                  |                            |                                                               | RCC89                     | 8.0     | 2.2 x 10 <sup>5</sup>      |
|                              |                  |                            |                                                               | RCC91                     | 7.3     | 4.2 x 10 <sup>4</sup>      |
|                              |                  |                            |                                                               | RCC94                     | 6.1     | 2.5 x 10 <sup>4</sup>      |
|                              |                  |                            |                                                               | RCC-DD1                   | 7.8     | 0.5 x 10 <sup>4</sup>      |
|                              |                  |                            |                                                               | RCC-DD2                   | 7.8     | 6.1 x 10 <sup>4</sup>      |
| <b>CD1c<sup>+</sup> DC</b>   | Blood healthy    | CD1c <sup>+</sup> DC_blood | CD11c <sup>+</sup><br>CD1c <sup>+</sup> CD19 <sup>-</sup>     | Donor 1                   | 9.0     | 2.0 x 10 <sup>4</sup>      |
|                              |                  |                            |                                                               | Donor 2                   | 7.4     | 1.2 x 10 <sup>4</sup>      |
|                              |                  |                            |                                                               | Donor 3                   | 6.2     | 1.0 x 10 <sup>4</sup>      |
| <b>slanDC</b>                | Blood healthy    | slanDC_blood               | CD11c <sup>+</sup> slan <sup>+</sup><br>CD19 <sup>-</sup>     | Donor 1                   | 7.6     | 1.5 x 10 <sup>4</sup>      |
|                              |                  |                            |                                                               | Donor 2                   | 8.8     | 5.0 x 10 <sup>4</sup>      |
|                              |                  |                            |                                                               | Donor 3                   | 8.6     | 2.7 x 10 <sup>4</sup>      |
| <b>Monocytes<sup>a</sup></b> | Blood healthy    | Mono_blood                 | CD14 <sup>+</sup>                                             | Donor Pool 1 <sup>+</sup> | 8.0     | 5.0 x 10 <sup>5</sup>      |
|                              |                  |                            |                                                               | Donor Pool 2 <sup>+</sup> | 8.6     | 5.0 x 10 <sup>5</sup>      |
|                              |                  |                            |                                                               | Donor Pool 3 <sup>+</sup> | 7.9     | 5.0 x 10 <sup>5</sup>      |
| <b>M1-MΦ<sup>b</sup></b>     | In vitro healthy | M1-MΦ_in vitro             | CD14 <sup>+</sup>                                             | Donor Pool 1 <sup>+</sup> | 8.2     | 5.0 x 10 <sup>5</sup>      |
|                              |                  |                            |                                                               | Donor Pool 2 <sup>+</sup> | 8.5     | 5.0 x 10 <sup>5</sup>      |
|                              |                  |                            |                                                               | Donor Pool 3 <sup>+</sup> | 8.7     | 5.0 x 10 <sup>5</sup>      |
| <b>M2-MΦ<sup>c</sup></b>     | In vitro healthy | M2-MΦ_in vitro             | CD14 <sup>+</sup>                                             | Donor Pool 1 <sup>+</sup> | 8.7     | 5.0 x 10 <sup>5</sup>      |
|                              |                  |                            |                                                               | Donor Pool 2 <sup>+</sup> | 8.8     | 5.0 x 10 <sup>5</sup>      |
|                              |                  |                            |                                                               | Donor Pool 3 <sup>+</sup> | 8.8     | 5.0 x 10 <sup>5</sup>      |

<sup>a</sup> Monocytes isolated from PBMC using CD14<sup>+</sup> microbeads (Miltenyi). <sup>b</sup> M1- and M2-macrophages (MΦ) generated as described [32]. <sup>+</sup> Each pool consists of cells from 5 different donors.

**Table S2B: human myeloid cell subtypes of external data sets used for comparison to ercDC\_ccRCC.**

| Name                                         | Origin          | No. of replicates | Accession code    |
|----------------------------------------------|-----------------|-------------------|-------------------|
| CD141 <sup>+</sup> DC_blood                  | Blood healthy   | 3                 | E-TABM-34 [74]    |
| CD11c <sup>HI</sup> MΦ_decidua               | decidua         | 8                 | GSE22342 [31]     |
| CD11c <sup>LO</sup> MΦ_decidua               | first trimester | 8                 |                   |
| CD103 <sup>+</sup> Sirpα <sup>+</sup> DC_gut | gut             | 3                 | GSE50380 [68]     |
| CD103 <sup>+</sup> Sirpα <sup>+</sup> DC_gut |                 | 5                 |                   |
| CD103 <sup>+</sup> Sirpα <sup>+</sup> DC_gut |                 | 3                 |                   |
| MΦ_NS_avlung_S                               | avlung          | 24                | GSE13896 [69] (S) |
| MΦ_S_avlung_S                                |                 | 34                |                   |
| MΦ_COPD_avlung_S                             |                 | 12                |                   |
| MΦ_NS_avlung_W                               | avlung          | 15                | GSE2125 [70] (W)  |
| MΦ_S_avlung_W                                |                 | 15                |                   |
| MΦ_asthma_avlung_W                           |                 | 15                |                   |
| TAM_GIST                                     | GIST            | 12                | GSE51697 [71]     |
| infDC_ascOvCa                                | ascOvCa         | 5                 | GSE40484 [73]     |
| Mono_RCC_blood                               | Blood of RCC    | 4                 | GSE38424 [3]      |

\_S\_ = smoker, \_NS\_ = non-smoker, \_S = Shaykhiev data; \_W = Woodruff data; GIST = gastrointestinal stromal tumor, COPD = chronic obstructive pulmonary disease, av = alveolar; ascOvCa = ascites of ovarian cancer



**Table S3: Antibodies.** Antibody concentrations for FACS sorting were adjusted to the total cell number of each sample. Isotypes were adjusted to the concentration of respective specific antibody.

| Antibody    | Label       | Species/Isotype | Clon       | Company                  |
|-------------|-------------|-----------------|------------|--------------------------|
| B7-DC/PD-L2 | APC         | Mouse IgG1, κ   | MIH18      | BD                       |
| B7-H1/PD-L1 | FITC        | Mouse IgG1, κ   | M1H1       | BD                       |
| B7-H3       | APC         | Mouse IgG2b, κ  | FM276      | Miltenyi Biotec          |
| CD1c        | FITC        | Mouse IgG2a     | AD5-8E7    | Miltenyi Biotec          |
| CD1c        | PE-Cy7      | Mouse IgG1, κ   | L161       | Biolegend                |
| CD11c       | APC         | Mouse IgG1      | B-ly6      | BD                       |
| CD11c       | A700        | Mouse IgG1      | B-ly6      | BD                       |
| CD11c       | PE          | Mouse IgG1, κ   | B-ly6      | BD                       |
| CD13/ANPEP  | APC         | Mouse IgG1, κ   | WM15       | BD                       |
| CD14        | PB          | Maus IgG2a, κ   | M5E2       | BD                       |
| CD14        | PerCP-Cy5.5 | Mouse IgG1, κ   | 61D3       | eBioscience              |
| CD19        | PB          | Mouse IgG1, κ   | HD37       | Dako                     |
| CD204/MSR1  | FITC        | rec. human IgG1 | REA460     | Miltenyi Biotec          |
| CD206/MRC1  | FITC        | Mouse IgG1, κ   | 15-2       | Biolgend                 |
| CD209       | APC         | Mouse IgG2b, κ  | DCN46      | BD                       |
| CD209       | PE          | Mouse IgG2b, κ  | DCN46      | BD                       |
| CD3         | PB          | Mouse IgG1, κ   | UCHT1      | BD                       |
| CD3         | V500        | Mouse IgG1      | UCHT1      | BD                       |
| CD32A       | unlabeled   | Goat IgG        | Polyclonal | R&D Systems              |
| CD36        | FITC        | Mouse IgG2a     | FA6-152    | Immunotech               |
| CD45        | PE-Cy7      | Mouse IgG1, κ   | HI30       | BD                       |
| CD45        | APC Cy7     | Mouse IgG1, κ   | HI30       | BD                       |
| CD56        | V450        | Mouse IgG1      | B159       | BD                       |
| CD64        | FITC        | Mouse IgG1, κ   | 22         | Beckman Coulter          |
| CD64        | PerCP Cy5.5 | Mouse IgG1      | 10.1       | BioLegend                |
| CD68        | FITC        | Mouse IgG       | Y1/82A     | BD                       |
| CD163       | PerCP Cy5.5 | Mouse IgG1, κ   | GHI/61     | BioLegend                |
| CD9         | FITC        | Mouse IgG1      | MEM-61     | EuroBioSciences          |
| CSF1R       | A700        | Mouse IgG1      | 61708      | R&D Systems              |
| FLT3        | APC         | Mouse IgG1      | BV10A4H2   | eBioscience              |
| GPNMB       | A700        | Mouse IgG2b     | 303822     | Novus Biologicals        |
| Isotype     | A700        | Mouse IgG1, κ   | 11711      | R&D Systems              |
| Isotype     | APC         | Mouse IgG1, κ   | 11711      | R&D Systems              |
| Isotype     | APC         | Mouse IgG2b, κ  | 27-35      | BD                       |
| Isotype     | FITC        | Mouse IgG1, κ   | MOPC21     | BD                       |
| Isotype     | PE          | Mouse IgG1      | MOPC21     | BD                       |
| Isotype     | PE          | Mouse IgG2b, κ  | MPC-11     | BioLegend                |
| Isotype     | PE-Cy7      | Mouse IgG1, κ   | MOPC21     | BD                       |
| Isotype     | FITC        | Mouse IgM       | IS5-20C4   | Miltenyi Biotec          |
| MerTK       | APC         | Mouse IgG1, κ   | 125518     | R&D Sytems               |
| NRP1        | FITC        | Mouse IgG1      | AD5-17F6   | Miltenyi Biotec          |
| Slan/M-DC8  | FITC        | Mouse IgM       | RCC-DD-1   | Miltenyi Biotec          |
| TIM-3       | FITC        | Rat IgG2a       | 344823     | R&D Systems              |
| VSIG4       | unlabeled   | Rabbit          | polyclonal | Abcam                    |
| Anti-goat   | A488        | Donkey IgG      | polyclonal | Thermo Fisher Scientific |

**Table S4: Patient characteristics of TCGA and Rostock cohort**

| TCGA cohort (n=442)      |                                |                  |                 |                                     |                             |                |                |                               |
|--------------------------|--------------------------------|------------------|-----------------|-------------------------------------|-----------------------------|----------------|----------------|-------------------------------|
| Parameter                |                                | N, value         |                 | %                                   |                             |                |                |                               |
| Sex                      | Male                           | 287              |                 | 65                                  |                             |                |                |                               |
|                          | Female                         | 155              |                 | 35                                  |                             |                |                |                               |
| Age (year)               | Median (range)                 | 60 (29-90)       |                 |                                     |                             |                |                |                               |
| Pathologic_T             | T1                             | 224              |                 | 51                                  |                             |                |                |                               |
|                          | T2                             | 55               |                 | 12                                  |                             |                |                |                               |
|                          | T3                             | 158              |                 | 36                                  |                             |                |                |                               |
|                          | T4                             | 5                |                 | 1                                   |                             |                |                |                               |
| Pathologic_N             | N0                             | 204              |                 | 46                                  |                             |                |                |                               |
|                          | N1                             | 10               |                 | 2                                   |                             |                |                |                               |
|                          | NX                             | 228              |                 | 52                                  |                             |                |                |                               |
| Pathologic_M             | M0                             | 353              |                 | 80                                  |                             |                |                |                               |
|                          | M1                             | 64               |                 | 14                                  |                             |                |                |                               |
|                          | MX                             | 23               |                 | 5                                   |                             |                |                |                               |
| G                        | G1                             | 9                |                 | 2                                   |                             |                |                |                               |
|                          | G2                             | 188              |                 | 43                                  |                             |                |                |                               |
|                          | G3                             | 177              |                 | 40                                  |                             |                |                |                               |
|                          | G4                             | 65               |                 | 15                                  |                             |                |                |                               |
|                          | GX                             | 1                |                 | 0.0                                 |                             |                |                |                               |
|                          | NA                             | 2                |                 | 0.0                                 |                             |                |                |                               |
| Follow-up time (year)    | Median (range)                 | 3.6 (0.0 – 12.4) |                 |                                     |                             |                |                |                               |
| Cancer-specific survival | Cancer-related death           | 87               |                 | 20                                  |                             |                |                |                               |
|                          | Alive/non-cancer-related death | 355              |                 | 80                                  |                             |                |                |                               |
| Rostock cohort [44,45]   |                                |                  |                 |                                     |                             |                |                |                               |
| Patient ID               | Tumor type                     | Age/ gender      | Tumor size (cm) | Tumor stage (tumor-node-metastasis) | Nuclear grade, 3-tiered WHO | Follow-up (mo) | Outcome Status | Normal tissue available (NZK) |
| Primary tumor G1         |                                |                  |                 |                                     |                             |                |                |                               |
| 12                       | ccRCC                          | 72/female        | 3.0             | pT2N0 M0V0R0                        | G1                          | 148            | ANED*          | X                             |
| 113                      | ccRCC                          | 59/male          | 4.0             | pT1 N0M0V0R0                        | G1                          | 133            | ANED           | X                             |
| 158                      | ccRCC                          | 72/male          | 3.2             | pT2 N0M0V0R0                        | G1                          | 126            | AWD            | X                             |
| 34                       | ccRCC                          | 65/male          | 5.2             | pT2N0M0V0R0                         | G1                          | 144            | ANED           | X                             |
| 348                      | ccRCC                          | 59/male          | 8.0             | pT2N0M0V0R0                         | G1                          | 67             | ANED           | X                             |
| 365                      | ccRCC                          | 62/female        | 5.5             | pT2N0M0V0R0                         | G1                          | 65             | ANED           | X                             |
| 165                      | ccRCC                          | 77/male          | 4.5             | pT1N0M0V0R0                         | G1                          | 125            | ANED           | X                             |
| 198                      | ccRCC                          | 70/male          | 3.8             | pT1N0M0V0R0                         | G1                          | 97             | DBOR           | X                             |
| 262                      | ccRCC                          | 71/female        | 5.0             | pT1N0M0V0R0                         | G1                          | 96             | ANED           |                               |
| 269                      | ccRCC                          | 53/female        | 8.0             | pT3aN0M0V0R0                        | G1                          | 94             | ANED           |                               |
| 286                      | ccRCC                          | 65/male          | 5.5             | pT1N0M0V0R1                         | G1                          | 93             | ANED           |                               |
| 288                      | ccRCC                          | 70/female        | 5.5             | pT1N0M0V0R0                         | G1                          | 90             | ANED           |                               |
| 290                      | ccRCC                          | 56/male          | 3.5             | pT1N0M0V0R0                         | G1                          | 89             | ANED           |                               |
| 294                      | ccRCC                          | 62/female        | 3.0             | pT1N0M0V0R0                         | G1                          | 76             | DBOR           |                               |
| Primary tumor G3         |                                |                  |                 |                                     |                             |                |                |                               |
| 89                       | ccRCC                          | 64/male          | 11.0            | pT3bN2M1V1R0                        | G3                          | 2              | DOTD           |                               |
| 188                      | ccRCC                          | 59/male          | 9.0             | pT2 N0M1V0R0                        | G3                          | 30             | DOTD           | X                             |
| 197                      | ccRCC                          | 63/male          | 13.0            | pT3bN1M1V1R0                        | G3                          | 23             | DOTD           | X                             |
| 254                      | ccRCC                          | 62/male          | 12.0            | pT3bN0M1V1R0                        | G3                          | 29             | DOTD           |                               |
| 382                      | ccRCC                          | 56/male          | 8.0             | pT3bN0M1V1R0                        | G3                          | 60             | AWD            | X                             |
| 351                      | ccRCC                          | 66/female        | 10.5            | pT3bN1M1V1R0                        | G3                          | 11             | DOTD           | X                             |
| 168                      | ccRCC                          | 58/male          | 12.0            | pT3aN0M0V1R1                        | G3                          | 46             | DOTD           |                               |
| 190                      | ccRCC                          | 56/male          | 8.6             | pT3bN0M0V1R0                        | G3                          | 31             | DOTD           | X                             |

|     |       |           |      |              |    |    |      |   |
|-----|-------|-----------|------|--------------|----|----|------|---|
| 230 | ccRCC | 55/female | 4.0  | pT3bN0M0V1R1 | G3 | 15 | DOTD |   |
| 345 | ccRCC | 59/male   | 13.0 | pT3aNXM1V0R0 | G3 | 60 | AWD  |   |
| 399 | ccRCC | 65/female | 7.5  | pT3aN0M1V0R0 | G3 | 15 | DOTD |   |
| 510 | ccRCC | 79/female | 5.0  | pT1aN0M1V1R0 | G3 | 3  | AWD  |   |
| 283 | ccRCC | 48/male   | 5.2  | pT1N0M1V1R0  | G3 | 94 | AWD  |   |
| 390 | ccRCC | 59/female | 16.0 | pT3bN0M1V1R1 | G3 | 2  | DOTD | X |

\* ANED = alive with no evidence of disease, AWD = alive with disease, DOTD = death of tumor disease, DBOR = death of other reason

**Table S5: M1-associated genes [31,32,69]. Bold: ercDC\_ccRCC marker gene, purple: ercDC\_ccRCC DEGs**

| Gene name                                               | Gene symbol/alternative name | Informative |
|---------------------------------------------------------|------------------------------|-------------|
| <b>Membrane receptors</b>                               |                              |             |
| Complement component 3a receptor 1                      | C3AR1                        | yes         |
| CCR7                                                    | CCR7                         | yes         |
| CD69                                                    | CD69                         | yes         |
| CD80                                                    | CD80                         | yes         |
| CD86                                                    | CD86                         | no          |
| Fc fragment of IgG, high affinity Ia, receptor (CD64)   | CD64/FCGR1A                  | yes         |
| Fc fragment of IgG, high affinity IIa, receptor (CD32)  | CD32/FCGR2A                  | yes         |
| Fc fragment of IgG, high affinity IIIa, receptor (CD16) | CD16/FCGR3A                  | yes         |
| ICAM1                                                   | ICAM1                        | yes         |
| Interleukin 15 receptor $\alpha$ chain                  | IL15RA                       | yes         |
| Interleukin 2 receptor $\alpha$ chain                   | <b>IL2RA</b>                 | yes         |
| Interleukin 7 receptor                                  | IL7R                         | yes         |
| Toll-like receptor 2                                    | TLR2                         | yes         |
| Toll-like receptor 4                                    | TLR4                         | yes         |
| <b>Cytokines and chemokines</b>                         |                              |             |
| CXCL11                                                  | CXCL11                       | yes         |
| CCL14                                                   | CCL14                        | no          |
| CCL15                                                   | CCL15                        | no          |
| CCL19                                                   | CCL19                        | yes         |
| CCL20                                                   | CCL20                        | yes         |
| CCL4                                                    | CCL4                         | yes         |
| CCL5                                                    | CCL5                         | yes         |
| CXCL1                                                   | CXCL1                        | yes         |
| CXCL10                                                  | CXCL10                       | yes         |
| CXCL9                                                   | <b>CXCL9</b>                 | yes         |
| Thymidine phosphorylase                                 | TYMP                         | yes         |
| Interleukin 12B                                         | IL12B                        | no          |
| Interleukin 15                                          | IL15                         | no          |
| Interleukin 18                                          | IL18                         | yes         |
| Interleukin 1B                                          | IL1B                         | yes         |
| Interleukin 23                                          | IL23                         | yes         |
| Interleukin 32                                          | IL32                         | yes         |
| Interleukin 6                                           | IL6                          | yes         |
| Nicotinamide phosphoribosyltransferase                  | NAMPT/PBEF1                  | yes         |
| Tumor necrosis factor ligand superfamily, member 2      | TNF                          | yes         |
| Tumor necrosis factor, $\alpha$ -induced protein 6      | TNFAIP6                      | yes         |
| Tumor necrosis factor (ligand) superfamily, member 10   | TRAIL                        | yes         |
| <b>Apoptosis associated genes</b>                       |                              |             |
| BCL2-related protein A1                                 | BCL2A1                       | yes         |
| Baculoviral 1AP repeat-containing 3                     | BIRC3                        | yes         |
| Tumor necrosis factor receptor superfamily, member 6    | FAS                          | yes         |
| Growth arrest and DNA-damage-inducible, $\gamma$        | GADD45G                      | yes         |
| XIAP associated factor-1                                | HSXIAPAF1                    | yes         |
| <b>Transport proteins</b>                               |                              |             |
| Solute carrier family 21, member 15                     | SLC21A15                     | yes         |

|                                                     |         |     |
|-----------------------------------------------------|---------|-----|
| Solute carrier family 2, member 6                   | SLC2A6  | yes |
| Solute carrier family 31, member 2                  | SLC31A2 | yes |
| Solute carrier family 7, member 5                   | SLC7A5  | yes |
| <b>Enzymes and other proteins</b>                   |         |     |
| Adenylate kinase 3                                  | AK3     | yes |
| B factor, properdin (complement factor B)           | CFB     | yes |
| Chitinase 3-like 2                                  | CHI3L2  | yes |
| Hydroxysteroid (11-β) dehydrogenase 1               | HSD11B1 | yes |
| Indoleamine 2,3 dioxygenase 1                       | IDO1    | yes |
| Nitric oxide synthase 2A (inducible)                | NOS2A   | no  |
| 2'-5'-oligoadenylate synthetase 2                   | OAS2    | yes |
| 2'-5'-oligoadenylate synthetase-like                | OASL    | yes |
| Phosphodiesterase 4B, cAMP-specific                 | PDE4B   | yes |
| 6-phosphofructo-2-kinase/fructo-2,6-biphosphatase 3 | PFKFB3  | yes |
| Phosphofructokinase                                 | PFKP    | yes |
| Phospholipase A1 member A                           | PLA1A   | yes |
| Proteasome subunit α type 2                         | PSMA2   | yes |
| Proteasome subunit β type 9                         | PSMB9   | yes |
| Proteasome activator subunit 2                      | PSME2   | yes |
| Sphingosine kinase 1                                | SPHK1   | yes |
| <b>Extracellular mediators</b>                      |         |     |
| Apolipoprotein L1                                   | APOL1   | yes |
| Apolipoprotein L2                                   | APOL2   | yes |
| Apolipoprotein L3                                   | APOL3   | yes |
| Apolipoprotein L6                                   | APOL6   | yes |
| Chondroitin sulfate proteoglycan 2                  | CSPG2   | yes |
| Endothelin 1                                        | EDN1    | yes |
| Insulin-like growth factor binding protein 4        | IGFBP4  | yes |
| Inhibin β A                                         | INHBA   | yes |
| Platelet-derived growth factor α                    | PDGFA   | yes |
| Pentraxin 3                                         | PTX3    | yes |
| <b>DNA binding factors</b>                          |         |     |
| Activating transcription factor 3                   | ATF3    | yes |
| Homeobox expressed in ES cells 1                    | HESX1   | yes |
| Interferon regulatory factor 1                      | IRF1    | yes |
| Interferon regulatory factor 7                      | IRF7    | yes |
| Storkhead box 1                                     | STOX1   | no  |
| <b>Signaling-associated genes</b>                   |         |     |
| Guanylate-binding protein 1, IFN-inducible          | GBP1    | yes |
| Guanylate-binding protein 2, IFN-inducible          | GBP2    | yes |
| Guanylate-binding protein 3                         | GBP3    | yes |
| Guanylate-binding protein 4                         | GBP4    | yes |
| Guanylate-binding protein 5                         | GBP5    | yes |
| Immunoresponsive 1 homolog                          | IRG1    | no  |
| Suppressor of cytokine signaling 3                  | SOCS3   | yes |
| <b>Function not known</b>                           |         |     |
| Chromosome 7 open reading frame 25                  | C7orf25 | yes |

**Table S6: M2-associated genes [31,32,69].** Bold: ercDC\_ccRCC marker gene, purple: ercDC\_ccRCC signature genes

| Gene name | Gene symbol/alternative name | Informative |
|-----------|------------------------------|-------------|
|-----------|------------------------------|-------------|

|                                                             |                        |     |
|-------------------------------------------------------------|------------------------|-----|
| <b>Membrane receptors</b>                                   |                        |     |
| Adenosine A3 receptor                                       | ADORA3                 | yes |
| CCR5                                                        | CCR5                   | yes |
| CD163                                                       | CD163                  | yes |
| CD36                                                        | CD36                   | yes |
| CD9                                                         | CD9                    | yes |
| C-type lectin family 7A                                     | CLEC7A/DECTIN1         | yes |
| C-type lectin domain family 10, member A                    | CLEC10A/CLECSF13       | yes |
| CXCR4                                                       | CXCR4                  | yes |
| CD302                                                       | CD302/DCL-1            | yes |
| CD209                                                       | <b>CD209/DC-SIGN</b>   | yes |
| Fc fragment IgE, low affinity II, receptor for (CD23)       | FCER2/CD23             | yes |
| G protein-coupled receptor 86                               | GPR86                  | yes |
| Histamine receptor H1                                       | HRH1                   | yes |
| IL4R                                                        | IL4R                   | yes |
| c-mer protooncogene tyrosine kinase                         | MERTK                  | yes |
| Mannose receptor, C type 1                                  | CD206/MRC1             | yes |
| Mannose receptor, C type 2                                  | MRC2                   | yes |
| Membrane-spanning 4-domains, subfamily A, member 4A         | <b>MS4A4A</b>          | yes |
| Membrane-spanning 4-domains, subfamily A, member 6A         | MS4A6A                 | yes |
| Macrophage scavenger receptor 1                             | CD204/MSR1             | yes |
| Purinergic receptor P2Y, G-protein coupled, 14              | P2RY14                 | yes |
| Purinergic receptor P2Y, G protein-coupled, 5               | P2RY5/LPAR6            | yes |
| Stabilin 1                                                  | STAB1                  | yes |
| Transforming growth factor $\beta$ receptor II              | TGFB2                  | yes |
| Toll-like receptor 5                                        | TLR5                   | yes |
| <b>Cytokines and chemokines</b>                             |                        |     |
| CCL13                                                       | CCL13                  | yes |
| CCL17                                                       | CCL17                  | yes |
| CCL18                                                       | <b>CCL18</b>           | yes |
| CCL22                                                       | CCL22                  | yes |
| CCL23                                                       | CCL23                  | yes |
| CCL24                                                       | CCL24                  | yes |
| Insulin-like growth factor 1                                | <b>IGF1</b>            | yes |
| Interleukin 10                                              | IL10                   | yes |
| IL1 receptor antagonist                                     | IL1RN                  | yes |
| TGFB1                                                       | TGFB1                  | yes |
| <b>Transport proteins</b>                                   |                        |     |
| Solute carrier family 21, member 15                         | <b>SLCO2B1/SLC21A9</b> | yes |
| Solute carrier family 38, member 6                          | <b>SLC38A6</b>         | yes |
| Solute carrier family 4, member 7                           | SLC4A7                 | yes |
| <b>Enzymes and other proteins</b>                           |                        |     |
| Adenosine kinase                                            | ADK                    | yes |
| Arachidonate 15-lipoxygenase                                | ALOX15                 | yes |
| Arginase 1                                                  | ARG1                   | no  |
| Carbonic anhydrase II                                       | CA2                    | yes |
| Ceramide kinase                                             | CERK                   | yes |
| Collagen, type VI, $\alpha$ 2                               | COL6A2                 | no  |
| Cathepsin C                                                 | CTSC                   | yes |
| Hexosaminidase B                                            | HEXB                   | yes |
| Histamine N-methyltransferase                               | HNMT                   | yes |
| Heparan sulfate (glucosamine) 3-O-sulfotransferase 1        | HS3ST1                 | yes |
| Heparan sulfate (glucosamine) 3-O-sulfotransferase 2        | HS3ST2                 | yes |
| Lipase A cholesterol esterase                               | LIPA                   | yes |
| Leukotriene A4 hydrolase                                    | LTA4H                  | yes |
| Matrixmetalloproteinase 2 (gelatinase A, 72-kDa gelatinase) | MMP2                   | yes |
| MMP7 (matrilysin, uterine)                                  | MMP7                   | yes |
| MMP9 (gelatinase B, 92-kDa gelatinase)                      | MMP9                   | yes |
| Tyrosylprotein sulfotransferase 2                           | TPST2                  | yes |
| <b>Extracellular mediators</b>                              |                        |     |
| Chimerin 2                                                  | CHN2                   | yes |
| Fibrinogen-like 2                                           | FGL2                   | yes |
| Fibronectin 1                                               | FN1                    | yes |
| Selenoprotein P, plasma, 1                                  | <b>SEPP1</b>           | yes |

|                                                               |            |     |
|---------------------------------------------------------------|------------|-----|
| Transforming growth factor, beta-induced, 68 kDa              | TGFB1      | yes |
| <b>DNA binding factors</b>                                    |            |     |
| Early growth response 2                                       | EGR2       | yes |
| Growth arrest-specific 7                                      | GAS7       | yes |
| <i>v-maf</i> musculoaponeurotic fibrosarcoma oncogene homolog | <b>MAF</b> | yes |
| <b>Signaling associated genes</b>                             |            |     |
| Regulator of G protein signaling 1                            | RGS1       | yes |

**Table S7: Markers of 3 tissue macrophage subtypes.** Adopted from [10], supplemented with genes from [56] (green).

| Marker                                                         | Gene symbol/ alternative name |
|----------------------------------------------------------------|-------------------------------|
| <b>Classical activated, bactericidal macrophages</b>           |                               |
| CCL15                                                          | CCL15 <sup>a</sup>            |
| CCL20                                                          | CCL20 <sup>b</sup>            |
| CXCL10                                                         | CXCL10                        |
| CXCL11                                                         | CXCL11                        |
| CXCL9                                                          | CXCL9                         |
| IL-12                                                          | IL12A/B <sup>b</sup>          |
| iNOS                                                           | NOS2 <sup>b</sup>             |
| <b>Wound healing associated, tissue modulating macrophages</b> |                               |
| CCL17                                                          | CCL17                         |
| CCL18                                                          | CCL18                         |
| CCL22                                                          | CCL22                         |
| DCIR                                                           | DCIR/CLEC4A                   |
| Factor XIII-A                                                  | F13A1                         |
| IGF-1                                                          | IGF1                          |
| IL-27R $\alpha$                                                | IL27RA                        |
| RELM $\alpha$                                                  | FIZZ1                         |
| Stabilin 1                                                     | STAB1                         |
| YM1                                                            | YM1                           |
| BEX3                                                           | NGFRAP1                       |
| C1q, subunit A                                                 | C1QA                          |
| C1q, subunit B                                                 | C1QB                          |
| COL1A2                                                         | COL1A2                        |
| COL3A1                                                         | COL3A1                        |
| COL4A2                                                         | COL4A2                        |
| COL6A3                                                         | COL6A3                        |
| FN1                                                            | FN1                           |
| Gas6                                                           | GAS6                          |
| HIF-2 $\alpha$                                                 | EPAS1                         |
| Hsp27                                                          | HSPB1                         |
| ITGB5                                                          | ITGB5                         |
| MMP-9                                                          | MMP9                          |
| PADI4                                                          | PADI4                         |
| Protein S                                                      | PROS1                         |
| S100-A4                                                        | S100A4                        |
| SDC2                                                           | SDC2                          |
| Serpin F1                                                      | SERPINF1                      |
| VCAN                                                           | VCAN                          |
| <b>Immunoregulatory macrophages</b>                            |                               |
| CCL1                                                           | CCL1                          |
| IL-10                                                          | IL10                          |
| LIGHT                                                          | LIGHT/TNFSF14                 |
| SPHK1                                                          | SPHK1                         |
| $\alpha$ 2M                                                    | A2M                           |
| CD9                                                            | CD9                           |
| c-Maf                                                          | MAF                           |
| DAB2                                                           | DAB2                          |
| CD209                                                          | CD209/DC-SIGN                 |
| DPEP2                                                          | DPEP2                         |
| IRAK3                                                          | IRAK3                         |
| CD206                                                          | CD206/MRC1                    |
| PGDS                                                           | PGDS                          |
| TNFRSF21                                                       | TNFRSF21                      |
| TREM2                                                          | TREM2                         |
| VSIG4                                                          | VSIG4                         |

<sup>a</sup> Gene not present in study group and could not be analyzed; <sup>b</sup> Gene not shown in figure 2A because it was only marginally expressed by all cell types or not suitable because it was not strongly expressed by positive controls compared to negative controls



**Table S8: Genes associated with invasion and angiogenesis** [57], gene set “angiogenesis” from GSEA MSigDB database [39] and factors listed at [http://www.sabiosciences.com/rt\\_pcr\\_product/HTML/PAHS-024A.html](http://www.sabiosciences.com/rt_pcr_product/HTML/PAHS-024A.html). (as of May 2014)

| Gene     | Entrez ID |
|----------|-----------|
| EGF      | 1950      |
| IL18     | 3606      |
| IL8      | 3576      |
| TGFB2    | 7042      |
| VEGFA    | 7422      |
| CCL2     | 6347      |
| CXCL2    | 2920      |
| CXCL3    | 2921      |
| CXCL5    | 6374      |
| FGF1     | 2246      |
| FGF2     | 2247      |
| HGF      | 3082      |
| HIF1A    | 3091      |
| IGF1     | 3479      |
| IL15     | 3600      |
| IL1B     | 3553      |
| IL6      | 3569      |
| KDR      | 3791      |
| MMP2     | 4313      |
| MMP9     | 4318      |
| NRP1     | 8829      |
| NRP2     | 8828      |
| PDGFA    | 5154      |
| PGF      | 5228      |
| PLAU     | 5328      |
| PTGS1    | 5742      |
| TEK      | 7010      |
| TGFA     | 7039      |
| TGFB1    | 7040      |
| TGFBR1   | 7046      |
| TNF      | 7124      |
| VEGFC    | 7424      |
| CTSB     | 1508      |
| ANGPT1   | 284       |
| FLT1     | 2321      |
| IL17A    | 3605      |
| SPP1     | 6696      |
| GPNNMB   | 10457     |
| MT1G     | 4495      |
| MMP7     | 4316      |
| CCL8     | 6355      |
| CCL22    | 6367      |
| CCL7     | 6354      |
| CCL4L2   | 388372    |
| APOE     | 348       |
| APOC1    | 341       |
| TNFAIP6  | 7130      |
| IL1A     | 3552      |
| A2M      | 2         |
| NR1H3    | 10062     |
| CTSL1    | 1514      |
| MT1E     | 4493      |
| PLTP     | 5360      |
| CCL4L1   | 9560      |
| ADAMDEC1 | 27299     |
| DFNA5    | 1687      |
| MT1H     | 4496      |

|          |       |
|----------|-------|
| SLC39A8  | 64116 |
| FPR3     | 2359  |
| CCL20    | 6364  |
| CXCL1    | 2919  |
| MT2A     | 4502  |
| SLCO2B1  | 11309 |
| ACP5     | 54    |
| TM4SF1   | 4071  |
| TGM2     | 7052  |
| NDP      | 4693  |
| PMP22    | 5376  |
| ABCA1    | 19    |
| TM7SF4   | 81501 |
| LPL      | 4023  |
| INDO     | 3620  |
| CCL3     | 6348  |
| GJB2     | 2706  |
| CYP27B1  | 1594  |
| SLC1A3   | 6507  |
| PTGES    | 9536  |
| CCL3L1   | 6349  |
| MAPK13   | 5603  |
| CCR7     | 1236  |
| IL23A    | 51561 |
| VSIG4    | 11326 |
| STEAP3   | 55240 |
| SCG5     | 6447  |
| CCND1    | 595   |
| CA12     | 771   |
| WBP5     | 51186 |
| LGMN     | 5641  |
| BCAT1    | 586   |
| EMP1     | 2012  |
| MAP1LC3A | 84557 |
| FBP1     | 2203  |
| F3       | 2152  |
| RASGRP3  | 25780 |
| GSN      | 2934  |
| CRABP2   | 1382  |
| ETV5     | 2119  |
| PPAP2B   | 8613  |
| IRAK2    | 3656  |
| CD9      | 928   |
| SCD      | 6319  |

**Table S9: List of 61 marker genes of ercDC\_ccRCC.** Genes were computed with the nearest shrunken centroids method (NSCM) [34]. 39 genes were upregulated, 22 genes downregulated compared to the other cells listed in heatmap figure 4A. Depicted are the shrunken centroid values (positive for upregulated, negative for downregulated genes) that indicate the degree of contribution of the gene to the profile.

| Gene symbol | Entrez ID | Shrunken Centroid value |
|-------------|-----------|-------------------------|
| CD209       | 30835     | 0.292                   |
| IGF1        | 3479      | 0.259                   |
| PLXDC1      | 57125     | 0.200                   |
| SEPP1       | 6414      | 0.194                   |
| FOLR2       | 2350      | 0.185                   |
| PLTP        | 5360      | 0.168                   |
| SCAMP5      | 192683    | 0.160                   |
| NUPR1       | 26471     | 0.142                   |
| C2          | 717       | 0.141                   |
| ME1         | 4199      | 0.140                   |
| GPNMB       | 10457     | 0.127                   |
| SDC3        | 9672      | 0.121                   |
| IL2RA       | 3559      | 0.100                   |
| SLCO2B1     | 11309     | 0.099                   |
| NRP1        | 8829      | 0.088                   |
| CCL8        | 6355      | 0.086                   |
| APOC1       | 341       | 0.083                   |
| CCL18       | 6362      | 0.080                   |
| GAL3ST4     | 79690     | 0.073                   |
| SIGLEC1     | 6614      | 0.073                   |
| SLC38A6     | 145389    | 0.071                   |
| C1QA        | 712       | 0.051                   |
| CRYAB       | 1410      | 0.050                   |
| SERPING1    | 710       | 0.048                   |
| ARHGAP12    | 94134     | 0.042                   |
| APOE        | 348       | 0.040                   |
| ANKRD36     | 375248    | 0.038                   |
| DAB2        | 1601      | 0.031                   |
| RHOBTB3     | 22836     | 0.030                   |
| ADAMDEC1    | 27299     | 0.026                   |
| MS4A4A      | 51338     | 0.024                   |
| NRP2        | 8828      | 0.023                   |
| ABCC5       | 10057     | 0.020                   |
| CIQB        | 713       | 0.018                   |
| LGMN        | 5641      | 0.016                   |
| FABP3       | 2170      | 0.014                   |
| CXCL9       | 4283      | 0.011                   |
| SLC7A8      | 23428     | 0.008                   |
| MAF         | 4094      | 0.003                   |
| TES         | 26136     | -0.006                  |
| LYST        | 1130      | -0.013                  |
| NEDD9       | 4739      | -0.018                  |
| CD48        | 962       | -0.023                  |
| FYN         | 2534      | -0.025                  |
| ACPP        | 55        | -0.033                  |
| FLNA        | 2316      | -0.037                  |
| IRAK3       | 11213     | -0.045                  |
| CAPN2       | 824       | -0.056                  |
| LILRA2      | 11027     | -0.058                  |
| CYTIP       | 9595      | -0.067                  |
| EMR3        | 84658     | -0.071                  |
| CDC42EP3    | 10602     | -0.078                  |
| LILRA1      | 11024     | -0.084                  |
| PLAC8       | 51316     | -0.088                  |
| FAM65B      | 9750      | -0.123                  |
| CCDC88C     | 440193    | -0.154                  |
| S100A12     | 6283      | -0.157                  |
| CD52        | 1043      | -0.228                  |
| FGR         | 2268      | -0.245                  |
| CFP         | 5199      | -0.282                  |
| FCN1        | 2219      | -0.461                  |

**Table S10: Upregulated ercDC\_ccRCC DEGs.** Please find list in separate excel file

**Table S11: Downregulated ercDC\_ccRCC DEGs.** Please find list in separate excel file

**Table S12: Top 20 overrepresented signaling pathways of upregulated ercDC\_ccRCC DEGs in InnateDB analysis [36-38]** (signaling pathways in orange are significantly overexpressed, adjusted p-value <0.05) or Top 20 overrepresented signaling pathways of ercDC\_ccRCC&infMP\_ascOvCa in GSEA analysis

| InnateDB upregulated signaling pathway s of ercDC_RCC DEGs            | Adjusted p-value        |
|-----------------------------------------------------------------------|-------------------------|
| Lysosome                                                              | 3.99 x 10 <sup>-7</sup> |
| Complement and coagulation cascades                                   | 1.57 x 10 <sup>-4</sup> |
| Beta1 integrin cell surface interactions                              | 7.68 x 10 <sup>-4</sup> |
| Collagen biosynthesis and modifying enzymes                           | 0.009                   |
| Beta3 integrin cell surface interactions                              | 0.016                   |
| HDL-mediated lipid transport                                          | 0.020                   |
| Phagosome                                                             | 0.041                   |
| ECM-receptor interaction                                              | 0.041                   |
| Regulation of complement cascade                                      | 0.068                   |
| NOD-like receptor signaling pathway                                   | 0.079                   |
| Staphylococcus aureus infection                                       | 0.098                   |
| Validated transcriptional targets of AP1 family members Fra1 and Fra2 | 0.113                   |
| Integrin cell surface interactions                                    | 0.114                   |
| Inhibition of matrix metalloproteinases                               | 0.148                   |
| Toll-like receptor signaling pathway                                  | 0.150                   |
| Chemokine receptors bind chemokines                                   | 0.158                   |
| Degradation of collagen                                               | 0.165                   |
| Fibrinolysis pathway                                                  | 0.166                   |
| Metal ion SLC transporters                                            | 0.166                   |
| Platelet amyloid precursor protein pathway                            | 0.166                   |

| GSEA overrepresented signaling pathways of ercDC_ccRCC&infMP_ascOvCa vs ctrl group | Data base | NES <sup>a</sup> | Marker genes/related genes „Leading edge“ <sup>b</sup> |
|------------------------------------------------------------------------------------|-----------|------------------|--------------------------------------------------------|
| Lysosome                                                                           | KEGG      | 1.94             | LGMN                                                   |
| Complement and coagulation cascades                                                | KEGG      | 1.86             | C2, SERPING1, C1QA, C1QB                               |
| Lipid digestion mobilization and transport                                         | Reactome  | 1.85             | PLTP, APOE                                             |
| Activation of chaperone genes by XBP1S                                             | Reactome  | 1.76             |                                                        |
| Arginine and proline metabolism                                                    | KEGG      | 1.69             |                                                        |
| Iron uptake and transport                                                          | Reactome  | 1.68             | HMOX1                                                  |
| Complement cascade                                                                 | Reactome  | 1.66             | C2, C1QA, C1QB                                         |
| Extracellular matrix organization                                                  | Reactome  | 1.66             |                                                        |
| MHC class II antigen presentation                                                  | Reactome  | 1.64             | LGMN                                                   |
| Unfolded protein response                                                          | Reactome  | 1.63             |                                                        |
| Diabetes pathways                                                                  | Reactome  | 1.61             | PLA2G7                                                 |
| Peptide ligand binding receptors                                                   | Reactome  | 1.60             | CXCL9, C3AR1                                           |
| Collagen formation                                                                 | Reactome  | 1.60             |                                                        |
| Response to elevated platelet cytosolic_CA2                                        | Reactome  | 1.58             | SERPING1                                               |
| Toll like receptor signaling pathway                                               | KEGG      | 1.55             | CXCL9, CD14                                            |
| Axon guidance                                                                      | Reactome  | 1.55             | NRP1, NRP2, GFRA2                                      |
| Amino sugar and nucleotide sugar metabolism                                        | KEGG      | 1.55             |                                                        |
| Signal transduction by L1                                                          | Reactome  | 1.54             | NRP1                                                   |
| Systemic lupus erythematosus                                                       | KEGG      | 1.53             | C2, C1QA, C1QB                                         |
| ECM receptor interaction                                                           | KEGG      | 1.53             | SDC3                                                   |

<sup>a</sup> NES was used for the arrangement of the top 20 signaling pathways with the strongest expression differences between ercDC\_ccRCC&infMP\_ascOvCa and control group because p-values and FDR values were very high. <sup>b</sup> ercDC\_ccRCC marker genes and their related genes that belong to the so called “leading edge” genes of respective gene sets.

**Table S13: Modules [40] and their assigned correlating/associated stimuli. Related to figure 7. We assigned a correlation/association of a stimulus with a module when the p-value was <0.05. If a correlation had a significance of  $p \leq 10^{-6}$ , solely this stimuli was listed as associated stimulus even if others had p-values <0.05. If none of the stimuli correlated with  $p \leq 10^{-6}$ , the two most significant stimuli ( $p < 0.05$ ) were used as module-associated stimuli. This approach is inspired by the connection of modules with M1- and M2-stimuli, respectively, described in Xue et al. The stimulus with the most significant correlation is listed first.**

| Module | Stimulus                                  |                                                         |
|--------|-------------------------------------------|---------------------------------------------------------|
|        | positive correlation                      | negative correlation                                    |
| 1      | LA, OA                                    | IL-13, IL-4                                             |
| 2      | n.d.                                      | IL-13, IL-4                                             |
| 3      | sLPS, M <sup>b</sup>                      | IL-13, LiA                                              |
| 4      | OA                                        | IL-13, IL-4                                             |
| 5      | PA                                        | IL-4, IL-13                                             |
| 6      | OA, LA                                    | TPP, sLPS + IC                                          |
| 7      | IFN- $\gamma$ , PA                        | TPP, TNF+ PGE <sub>2</sub>                              |
| 8      | IFN- $\gamma$                             | TPP*                                                    |
| 9      | IFN- $\gamma$ + TNF, IFN- $\gamma$        | TPP, TPP + IFN- $\beta$                                 |
| 10     | IL-4, TNF                                 | PA, LiA                                                 |
| 11     | IL-4                                      | PA                                                      |
| 12     | IL-4, IFN- $\gamma$                       | TPP                                                     |
| 13     | IL-4, IL-13                               | TPP                                                     |
| 14     | IL-4                                      | sLPS, upLPS + IC                                        |
| 15     | IL-4                                      | TPP*                                                    |
| 16     | PA                                        | IL-4, TPP + IFN- $\gamma$                               |
| 17     | PA                                        | IL-4, IFN- $\gamma$ + TNF                               |
| 18     | PA                                        | sLPS, TPP                                               |
| 19     | PA                                        | IL-4, upLPS                                             |
| 20     | PA                                        | TPP                                                     |
| 21     | PA                                        | TPP + IFN- $\beta$ , TPP                                |
| 22     | OA                                        | TPP + IFN- $\beta$ + IFN- $\gamma$ , TPP + IFN- $\beta$ |
| 23     | OA, LiA                                   | TPP, sLPS                                               |
| 24     | OA                                        | TPP, TPP + IFN- $\beta$ + IFN- $\gamma$                 |
| 25     | PA                                        | sLPS, TPP                                               |
| 26     | LiA                                       | sLPS, TPP                                               |
| 27     | LA, HDL                                   | sLPS                                                    |
| 28     | OA, IL-4                                  | sLPS                                                    |
| 29     | TNF+ PGE <sub>2</sub> , TPP               | M <sup>b</sup> , IFN- $\gamma$                          |
| 30     | TPP                                       | IL-4, M <sup>b</sup>                                    |
| 31     | PA                                        | IL-4, M <sup>b</sup>                                    |
| 32     | TPP                                       | IL-4, M <sup>b</sup>                                    |
| 33     | TPP                                       | PA, OA                                                  |
| 34     | TPP, sLPS + IC                            | OA, LA                                                  |
| 35     | IFN- $\gamma$ + TNF, sLPS + IFN- $\gamma$ | OA, LA                                                  |
| 36     | TPP, P3C + PGE <sub>2</sub>               | OA, IFN- $\gamma$                                       |
| 37     | IL-4, upLPS                               | PA                                                      |
| 38     | TPP, sLPS + IC                            | OA                                                      |
| 39     | TPP, PGE <sub>2</sub>                     | PA                                                      |
| 40     | TPP, upLPS                                | PA                                                      |
| 41     | GC, PGE <sub>2</sub>                      | PA, TNF                                                 |
| 42     | GC, M <sup>b</sup>                        | PA, TNF + PGE <sub>2</sub>                              |
| 43     | M <sup>b</sup> , PGE <sub>2</sub>         | sLPS, IFN- $\gamma$ + TNF                               |
| 44     | OA, GC                                    | IFN- $\gamma$ , TPP + IFN- $\beta$ + IFN- $\gamma$      |
| 45     | IL-4                                      | PA, sLPS                                                |
| 46     | IL-4                                      | PA                                                      |
| 47     | IL-4, GC                                  | PA                                                      |
| 48     | IL-4                                      | PA, OA                                                  |
| 49     | n.d.                                      | n.d.                                                    |

\*Only one stimulus possessed a p-value <0.05, but > $10^{-6}$  for the module; n.d.: not detected; M<sup>b</sup>: baseline macrophages

## Supplemental experimental procedures

### Characteristics of human myeloid cell types from different non-lymphoid tissues used for comparison with the ercDC transcriptome

Renal DCs and macrophages are thought to play a role in protecting the kidney tubulointerstitium from immune attack-induced injury through T-cell tolerizing mechanisms [67]. To gain insight if ercDCs might exhibit tolerizing features associated with tissue/tumor immune protection, we thought to compare the ercDC transcriptome to that of other myeloid cell types originating from tissues with a known tolerogenic milieu (table S2B). Of particular interest were the CD11c<sup>HI</sup> and CD11c<sup>LO</sup> decidual macrophages (previously designated decidual DCs) [31], found in the tolerogenic placenta during early pregnancy. Like ercDCs, they are described to co-express CD209, CD14 as well as CD163, and seemed to be capable of antigen presentation, CD11c<sup>HI</sup> macrophages mainly expressed genes associated with lipid metabolism and inflammation, while CD11c<sup>LO</sup> macrophages exhibited strong expression of genes associated with tissue modulation, which are important for embryo implantation, but also for tumor growth and progression. As an additional data set we selected transcriptomes of myeloid cells from gut and lung, considering that in these organs, the immune system is important to maintain the balance between immunity and peripheral tolerance. Three different DC subtypes are described in the lamina propria distinguished based on the expression of CD103 and Sirpα [68]). CD103<sup>+</sup>Sirpα<sup>-</sup> DCs are described to resemble CD141<sup>+</sup> DCs from blood and express marker associated with crosspresentation; CD103<sup>+</sup>Sirpα<sup>+</sup> DCs have a described similarity with CD1c<sup>+</sup> DCs from blood. They are known to induce T<sub>H</sub>17 cells and express CD209 and genes associated with tolerizing functions. The third population, CD103<sup>-</sup>Sirpα<sup>+</sup> DCs, has strong similarity with monocyte-derived DCs (MoDCs) and is thought to effectively expand T<sub>H</sub>1 cells. Concerning myeloid cells from lung, two data sets were available [69,70]. They included macrophages isolated from non-smokers, smokers and COPD or asthma patients, respectively. Macrophages from smokers and COPD patients are described to express features associated with downregulating M1-associated proinflammatory genes and upregulating M2-associated regulatory genes compared to macrophages from non-smokers [69]. They expressed high amounts of MMPs, a characteristic also described for macrophages in the tumors.

Further, we selected data sets of human tumor samples. These included, macrophages from gastrointestinal stromal tumors (GIST) [71] and inflammatory macrophages and DCs from ascites of ovarian cancer patients [72]. Notably, the macrophages from GIST are described to have antitumoral, proinflammatory features resembling M1-macrophages. As representative for DCs with the capability of crosspresentation and activation of CD8<sup>+</sup> T cells [75,76] we selected the data sets of CD141<sup>+</sup> DCs from Lindstedt et al. [74].

# Supplemental references (numbers according to the listing in the main text)

10. Mosser, D.M.; Edwards, J.P. Exploring the full spectrum of macrophage activation. *Nat Rev Immunol* 2008, 8, 958-969, doi:10.1038/nri2448.
31. Houser, B.L.; Tilburgs, T.; Hill, J.; Nicotra, M.L.; Strominger, J.L. Two unique human decidual macrophage populations. *J Immunol* 2011, 186, 2633-2642, doi:10.4049/jimmunol.1003153.
32. Martinez, F.O.; Gordon, S.; Locati, M.; Mantovani, A. Transcriptional profiling of the human monocyte-to-macrophage differentiation and polarization: new molecules and patterns of gene expression. *J Immunol* 2006, 177, 7303-7311, doi:10.4049/jimmunol.177.10.7303.
34. Tibshirani, R.; Hastie, T.; Narasimhan, B.; Chu, G. Diagnosis of multiple cancer types by shrunken centroids of gene expression. *Proc Natl Acad Sci U S A* 2002, 99, 6567-6572, doi:10.1073/pnas.082099299.
36. Breuer, K.; Froushani, A.K.; Laird, M.R.; Chen, C.; Sribnaia, A.; Lo, R.; Winsor, G.L.; Hancock, R.E.; Brinkman, F.S.; Lynn, D.J. InnateDB: systems biology of innate immunity and beyond--recent updates and continuing curation. *Nucleic Acids Res* 2013, 41, D1228-1233, doi:10.1093/nar/gks1147.
37. Lynn, D.J.; Chan, C.; Naseer, M.; Yau, M.; Lo, R.; Sribnaia, A.; Ring, G.; Que, J.; Wee, K.; Winsor, G.L.; et al. Curating the innate immunity interactome. *BMC Syst Biol* 2010, 4, 117, doi:10.1186/1752-0509-4-117.
38. Lynn, D.J.; Winsor, G.L.; Chan, C.; Richard, N.; Laird, M.R.; Barsky, A.; Gardy, J.L.; Roche, F.M.; Chan, T.H.; Shah, N.; et al. InnateDB: facilitating systems-level analyses of the mammalian innate immune response. *Mol Syst Biol* 2008, 4, 218, doi:10.1038/msb.2008.55.
39. Subramanian, A.; Tamayo, P.; Mootha, V.K.; Mukherjee, S.; Ebert, B.L.; Gillette, M.A.; Paulovich, A.; Pomeroy, S.L.; Golub, T.R.; Lander, E.S.; et al. Gene set enrichment analysis: a knowledge-based approach for interpreting genome-wide expression profiles. *Proc Natl Acad Sci U S A* 2005, 102, 15545-15550, doi:10.1073/pnas.0506580102.
40. Xue, J.; Schmidt, S.V.; Sander, J.; Draffehn, A.; Krebs, W.; Quester, I.; De Nardo, D.; Gohel, T.D.; Emde, M.; Schmidleithner, L.; et al. Transcriptome-based network analysis reveals a spectrum model of human macrophage activation. *Immunity* 2014, 40, 274-288, doi:10.1016/j.immuni.2014.01.006.
44. Maruschke, M.; Hakenberg, O.W.; Koczan, D.; Zimmermann, W.; Stief, C.G.; Buchner, A. Expression profiling of metastatic renal cell carcinoma using gene set enrichment analysis. *Int J Urol* 2014, 21, 46-51, doi:10.1111/iju.12183.
45. Maruschke, M.; Reuter, D.; Koczan, D.; Hakenberg, O.W.; Thiesen, H.J. Gene expression analysis in clear cell renal cell carcinoma using gene set enrichment analysis for biostatistical management. *BJU Int.* 2011, 108, E29-35, doi:10.1111/j.1464-410X.2010.09794.x.
56. Gustafsson, C.; Mjosberg, J.; Matussek, A.; Geffers, R.; Matthiesen, L.; Berg, G.; Sharma, S.; Buer, J.; Emerudh, J. Gene expression profiling of human decidual macrophages: evidence for immunosuppressive phenotype. *PLoS One* 2008, 3, e2078, doi:10.1371/journal.pone.0002078.
57. Wang, T.; Ge, Y.; Xiao, M.; Lopez-Coral, A.; Azuma, R.; Somasundaram, R.; Zhang, G.; Wei, Z.; Xu, X.; Rauscher, F.J., 3rd; et al. Melanoma-derived conditioned media efficiently induce the differentiation of monocytes to macrophages that display a highly invasive gene signature. *Pigment Cell Melanoma Res* 2012, 25, 493-505, doi:10.1111/j.1755-148X.2012.01005.x.
67. Kurts, C.; Heymann, F.; Lukacs-Kornek, V.; Boor, P.; Floege, J. Role of T cells and dendritic cells in glomerular immunopathology. *Semin Immunopathol* 2007, 29, 317-335, doi:10.1007/s00281-007-0096-x.
68. Watchmaker, P.B.; Lahl, K.; Lee, M.; Baumjohann, D.; Morton, J.; Kim, S.J.; Zeng, R.; Dent, A.; Ansel, K.M.; Diamond, B.; et al. Comparative transcriptional and functional profiling defines conserved programs of intestinal DC differentiation in humans and mice. *Nat Immunol* 2014, 15, 98-108, doi:10.1038/ni.2768.
69. Shaykhiev, R.; Krause, A.; Salit, J.; Strulovici-Barel, Y.; Harvey, B.G.; O'Connor, T.P.; Crystal, R.G. Smoking-dependent reprogramming of alveolar macrophage polarization: implication for pathogenesis of chronic obstructive pulmonary disease. *J Immunol* 2009, 183, 2867-2883, doi:10.4049/jimmunol.0900473.
70. Woodruff, P.G.; Koth, L.L.; Yang, Y.H.; Rodriguez, M.W.; Favoreto, S.; Dolganov, G.M.; Paquet, A.C.; Erle, D.J. A distinctive alveolar macrophage activation state induced by cigarette smoking. *Am J Respir Crit Care Med* 2005, 172, 1383-1392, doi:10.1164/rccm.200505-686OC.
71. Cavnar, M.J.; Zeng, S.; Kim, T.S.; Sorenson, E.C.; Ocun, L.M.; Balachandran, V.P.; Seifert, A.M.; Greer, J.B.; Popow, R.; Crawley, M.H.; et al. KIT oncogene inhibition drives intratumoral macrophage M2 polarization. *J Exp Med* 2013, 210, 2873-2886, doi:10.1084/jem.20130875.
72. Segura, E.; Amigorena, S. Inflammatory dendritic cells in mice and humans. *Trends Immunol* 2013, 34, 440-445, doi:10.1016/j.it.2013.06.001.
73. Segura, E.; Touzot, M.; Bohineust, A.; Cappuccio, A.; Chiocchia, G.; Hosmalin, A.; Dalod, M.; Soumelis, V.; Amigorena, S. Human inflammatory dendritic cells induce Th17 cell differentiation. *Immunity* 2013, 38, 336-348, doi:10.1016/j.immuni.2012.10.018.
74. Lindstedt, M.; Lundberg, K.; Borrebaeck, C.A. Gene family clustering identifies functionally associated subsets of human in vivo blood and tonsillar dendritic cells. *J Immunol* 2005, 175, 4839-4846, doi:10.4049/jimmunol.175.8.4839.
75. Bachem, A.; Guttler, S.; Hartung, E.; Ebstein, F.; Schaefer, M.; Tannert, A.; Salama, A.; Movassaghi, K.; Opitz, C.; Mages, H.W.; et al. Superior antigen cross-presentation and XCR1 expression define human CD11c+CD141+ cells as homologues of mouse CD8+ dendritic cells. *J Exp Med* 2010, 207, 1273-1281, doi:10.1084/jem.20100348.
76. Mittag, D.; Proietto, A.I.; Loudovaris, T.; Mannering, S.I.; Vremec, D.; Shortman, K.; Wu, L.; Harrison, L.C. Human dendritic cell subsets from spleen and blood are similar in phenotype and function but modified by donor health status. *J Immunol* 2011, 186, 6207-6217, doi:10.4049/jimmunol.1002632.
85. Chittezhath, M.; Dhillon, M.K.; Lim, J.Y.; Laoui, D.; Shalova, I.N.; Teo, Y.L.; Chen, J.; Kamaraj, R.; Raman, L.; Lum, J.; et al. Molecular profiling reveals a tumor-promoting phenotype of monocytes and macrophages in human cancer progression. *Immunity* 2014, 41, 815-829, doi:10.1016/j.immuni.2014.09.014.
